# Supplementary material for: Exploring the Phytochemicals of Acacia melanoxylon R. Br
Source: MDPI journal article supplement (doi:10.3390/plants10122698), 2021-12-08

# Exploring the Phytochemicals of *Acacia melanoxylon* R. Br.

Diana Alves<sup>1</sup>, Sidónio Duarte<sup>1</sup>, Pedro Arsénio<sup>2</sup>, Joana Gonçalves<sup>3</sup>, Cecília M. P. Rodrigues<sup>3</sup>, Ana Lourenço<sup>1,\*</sup> and Patrícia Máximo<sup>1,\*</sup>

|                                                                                                                                                                                        |    |
|----------------------------------------------------------------------------------------------------------------------------------------------------------------------------------------|----|
| Figure S1 - <sup>1</sup> H NMR spectrum of Lupeol <b>1</b> (unpurified) (CDCl <sub>3</sub> , 400 MHz)                                                                                  | 3  |
| Figure S2 - <sup>1</sup> H NMR spectrum of 3β- <i>Z</i> -coumaroyl lupeol <b>2</b> (unpurified) (CDCl <sub>3</sub> , 400 MHz)                                                          | 3  |
| Figure S3 - <sup>13</sup> C NMR spectrum of 3β- <i>Z</i> -coumaroyl lupeol <b>2</b> (unpurified) (CDCl <sub>3</sub> , 100 MHz)                                                         | 4  |
| Figure S4 - DEPT135 spectrum of 3β- <i>Z</i> -coumaroyl lupeol <b>2</b> (unpurified) (CDCl <sub>3</sub> )                                                                              | 4  |
| Figure S5 - HSQC spectrum of 3β- <i>Z</i> -coumaroyl lupeol <b>2</b> (unpurified) (CDCl <sub>3</sub> )                                                                                 | 5  |
| Figure S6 - HMBC spectrum of 3β- <i>Z</i> -coumaroyl lupeol <b>2</b> (unpurified) (CDCl <sub>3</sub> )                                                                                 | 5  |
| Figure S7 - COSY spectrum of 3β- <i>Z</i> -coumaroyl lupeol <b>2</b> (unpurified) (CDCl <sub>3</sub> )                                                                                 | 6  |
| Figure S8 - NOESY spectrum of 3β- <i>Z</i> -coumaroyl lupeol <b>2</b> (unpurified) (CDCl <sub>3</sub> )                                                                                | 6  |
| Figure S9 - <sup>1</sup> H NMR spectrum of 3β- <i>E</i> -coumaroyl lupeol (dioslupecin A) <b>3</b> (unpurified) (CDCl <sub>3</sub> , 400 MHz)                                          | 7  |
| Figure S10 - <sup>13</sup> C NMR spectrum of 3β- <i>E</i> -coumaroyl lupeol (dioslupecin A) <b>3</b> (unpurified) (CDCl <sub>3</sub> , 100 MHz)                                        | 7  |
| Figure S11 - DEPT135 spectrum of 3β- <i>E</i> -coumaroyl lupeol (dioslupecin A) <b>3</b> (unpurified) (CDCl <sub>3</sub> )                                                             | 8  |
| Figure S12 - HSQC spectrum of 3β- <i>E</i> -coumaroyl lupeol (dioslupecin A) <b>3</b> (unpurified) (CDCl <sub>3</sub> )                                                                | 8  |
| Figure S13 - HMBC spectrum of 3β- <i>E</i> -coumaroyl lupeol (dioslupecin A) <b>3</b> (unpurified) (CDCl <sub>3</sub> )                                                                | 9  |
| Figure S14 - NOESY spectrum of 3β- <i>E</i> -coumaroyl lupeol (dioslupecin A) <b>3</b> (unpurified) (CDCl <sub>3</sub> )                                                               | 9  |
| Figure S15 - <sup>1</sup> H NMR spectrum of the mixture of 3β- <i>Z</i> -coumaroyl lupeol <b>2</b> and 3β- <i>E</i> -coumaroyl lupeol <b>3</b> (1.0:2.0) (CDCl <sub>3</sub> , 500 MHz) | 10 |
| Figure S16 - GC-FID chromatogram of the mixture of 3β- <i>Z</i> -coumaroyl lupeol <b>2</b> and 3β- <i>E</i> -coumaroyl lupeol <b>3</b> (1.0:1.6)                                       | 11 |
| Figure S17 - <sup>1</sup> H NMR spectrum of the mixture of 3β- <i>Z</i> -coumaroyl lupeol <b>2</b> and 3β- <i>E</i> -coumaroyl lupeol <b>3</b> (1.0:4.4) (CDCl <sub>3</sub> , 500 MHz) | 12 |
| Figure S18 - <sup>1</sup> H NMR spectrum of kolaviv acid 15-methyl ester <b>4</b> (CDCl <sub>3</sub> , 500 MHz)                                                                        | 12 |
| Figure S19 - <sup>13</sup> C NMR spectrum of kolaviv acid 15-methyl ester <b>4</b> (CDCl <sub>3</sub> , 125 MHz)                                                                       | 13 |

|                                                                                                                          |    |
|--------------------------------------------------------------------------------------------------------------------------|----|
| Figure S20 - DEPT135 spectrum of kolavic acid 15-methyl ester <b>4</b> (CDCl <sub>3</sub> )                              | 13 |
| Figure S21 - HSQC spectrum of kolavic acid 15-methyl ester <b>4</b> (CDCl <sub>3</sub> )                                 | 14 |
| Figure S22 - HMBC spectrum of kolavic acid 15-methyl ester <b>4</b> (CDCl <sub>3</sub> )                                 | 14 |
| Figure S23 - COSY spectrum of kolavic acid 15-methyl ester <b>4</b> (CDCl <sub>3</sub> )                                 | 15 |
| Figure S24 - NOESY spectrum of kolavic acid 15-methyl ester <b>4</b> (CDCl <sub>3</sub> )                                | 15 |
| Figure S25 - ESI-MS spectra of kolavic acid 15-methyl ester <b>4</b>                                                     | 16 |
|                                                                                                                          |    |
| Figure S26 - <sup>1</sup> H NMR spectrum of vomifoliol (blumenol A) <b>5</b> (unpurified) (CDCl <sub>3</sub> , 500 MHz)  | 17 |
| Figure S27 - <sup>13</sup> C NMR spectrum of vomifoliol (blumenol A) <b>5</b> (unpurified) (CDCl <sub>3</sub> , 125 MHz) | 17 |
| Figure S28 - DEPT135 spectrum of vomifoliol (blumenol A) <b>5</b> (unpurified) (CDCl <sub>3</sub> )                      | 18 |
| Figure S29 - HSQC spectrum of vomifoliol (blumenol A) <b>5</b> (unpurified) (CDCl <sub>3</sub> )                         | 18 |
| Figure S30 - HMBC spectrum of vomifoliol (blumenol A) <b>5</b> (unpurified) (CDCl <sub>3</sub> )                         | 19 |
| Figure S31 - COSY spectrum of vomifoliol (blumenol A) <b>5</b> (unpurified) (CDCl <sub>3</sub> )                         | 19 |
| Figure S32 - ESI-MS spectra of vomifoliol (blumenol A) <b>5</b> (unpurified)                                             | 20 |

Figure S1 -  $^1\text{H}$  NMR spectrum of Lupeol **1** (unpurified) ( $\text{CDCl}_3$ , 400 MHz)

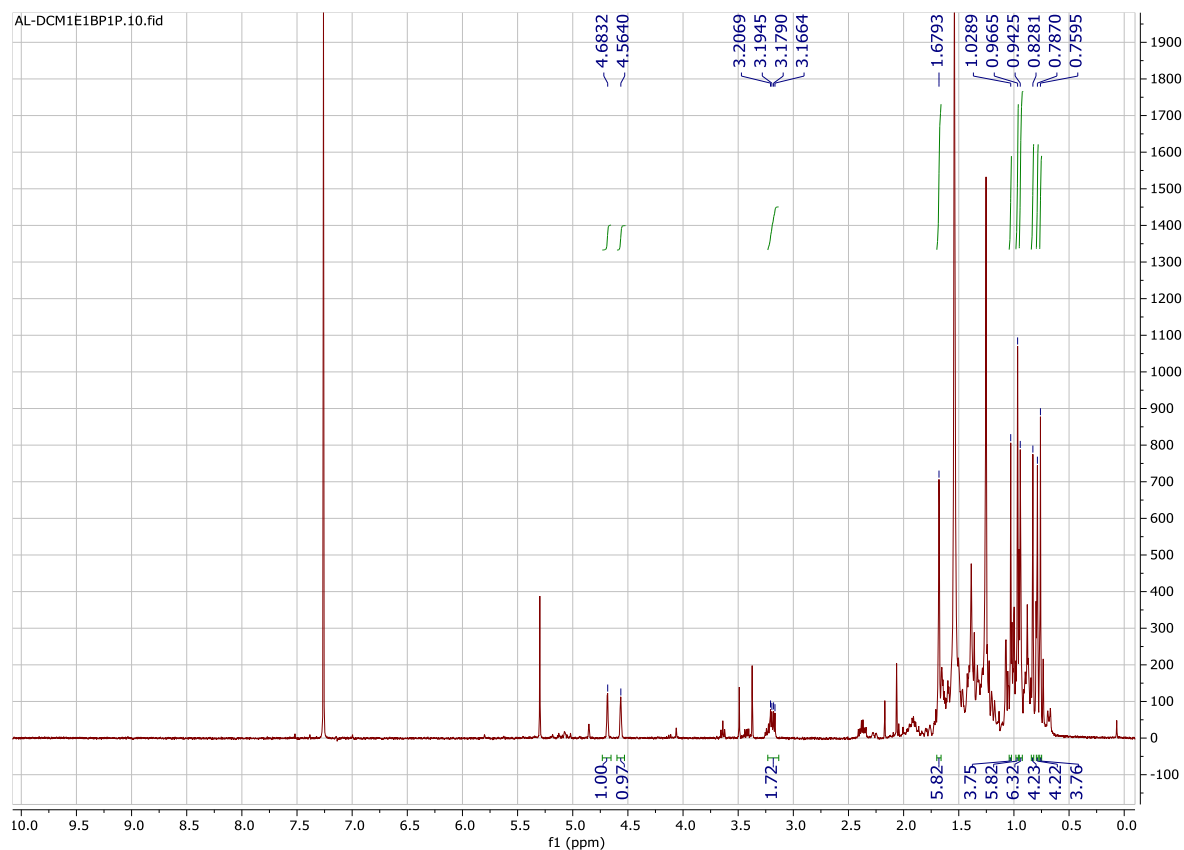

Figure S2 -  $^1\text{H}$  NMR spectrum of  $3\beta$ -Z-coumaroyl lupeol **2** (unpurified) ( $\text{CDCl}_3$ , 400 MHz)

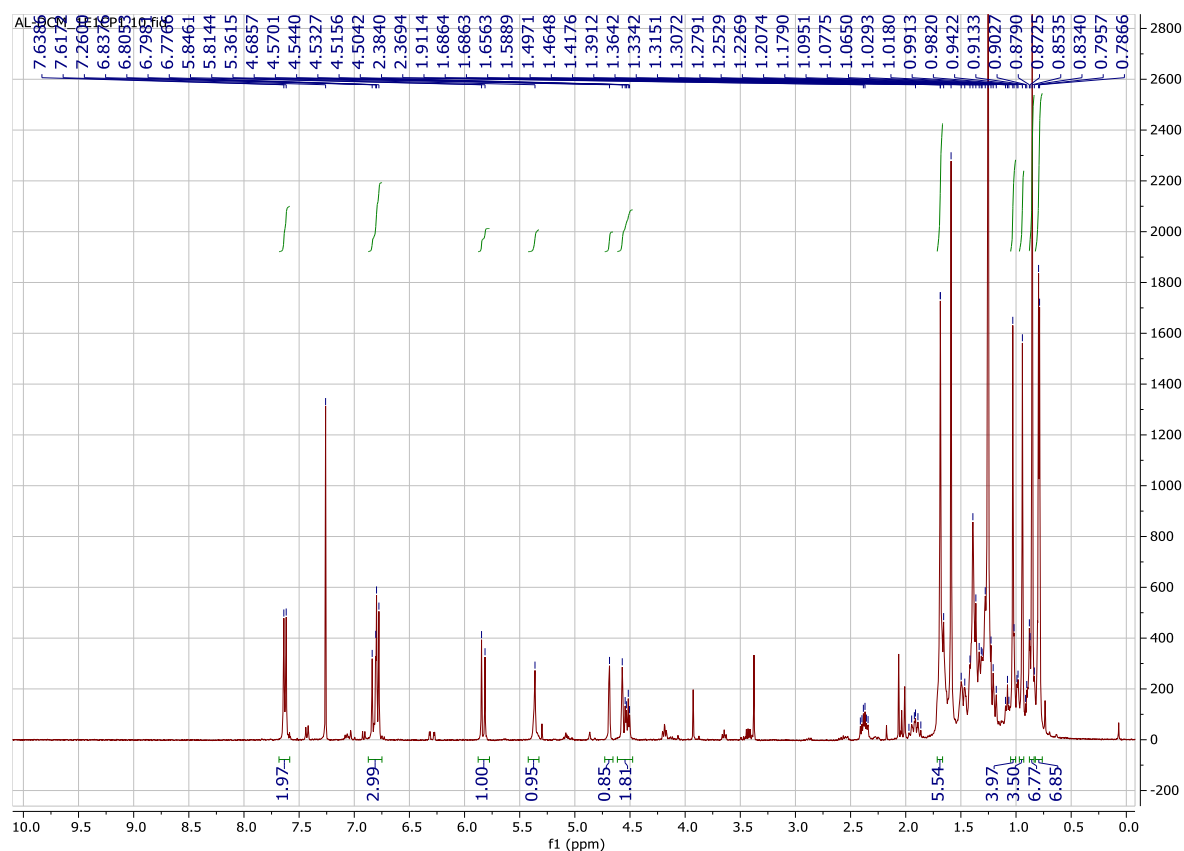

Figure S3 -  $^{13}\text{C}$  NMR spectrum of 3 $\beta$ -Z-coumaroyl lupeol **2** (unpurified) ( $\text{CDCl}_3$ , 100 MHz)

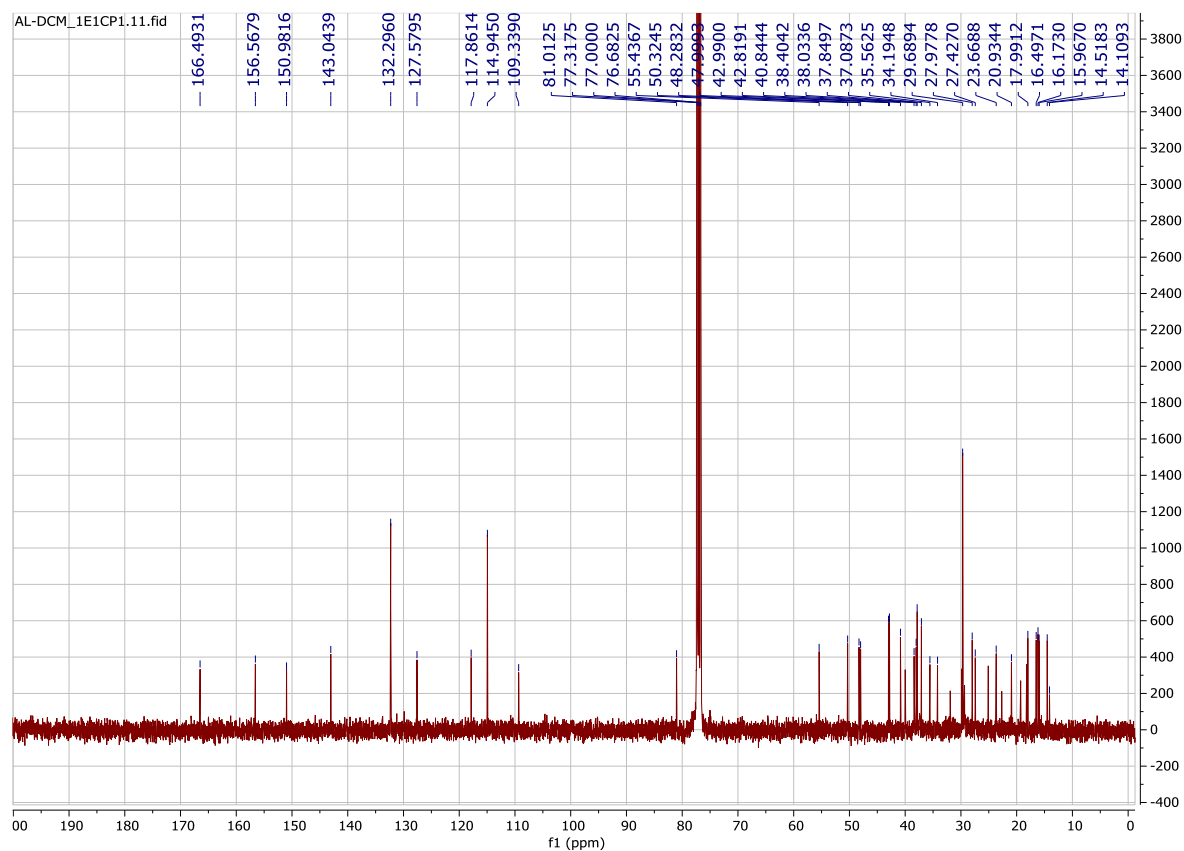

Figure S4 - DEPT135 spectrum of 3 $\beta$ -Z-coumaroyl lupeol **2** (unpurified) ( $\text{CDCl}_3$ )

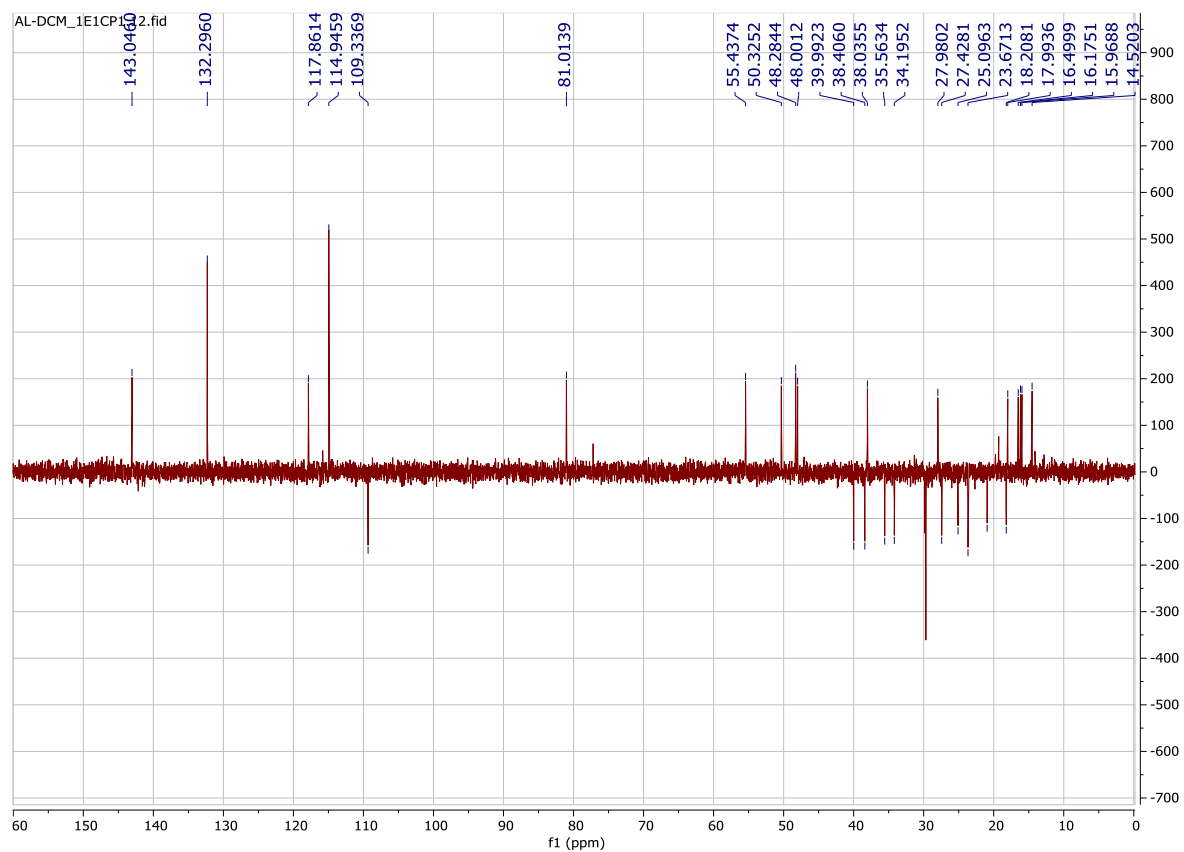

Figure S5 - HSQC spectrum of 3 $\beta$ -Z-coumaroyl lupeol **2** (unpurified) (CDCl<sub>3</sub>)

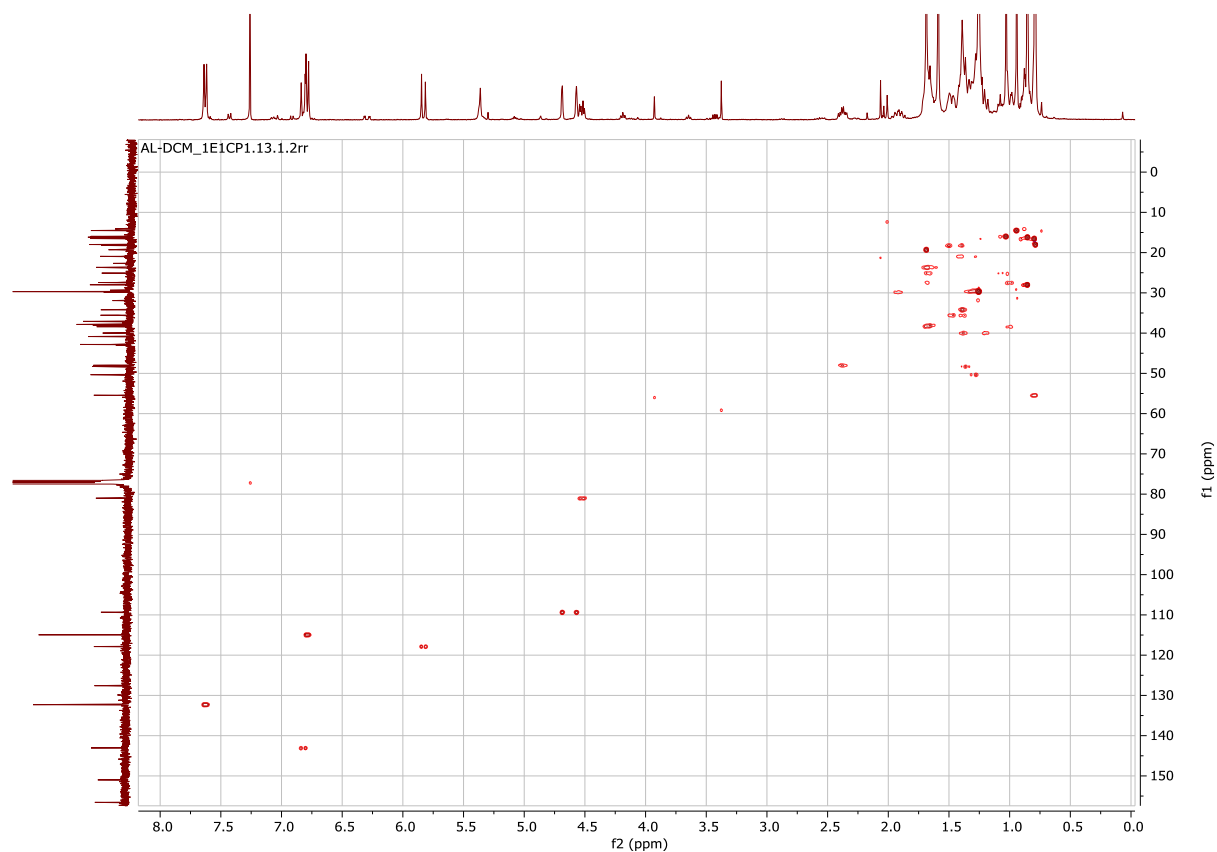

Figure S6 - HMBC spectrum of 3 $\beta$ -Z-coumaroyl lupeol **2** (unpurified) (CDCl<sub>3</sub>)

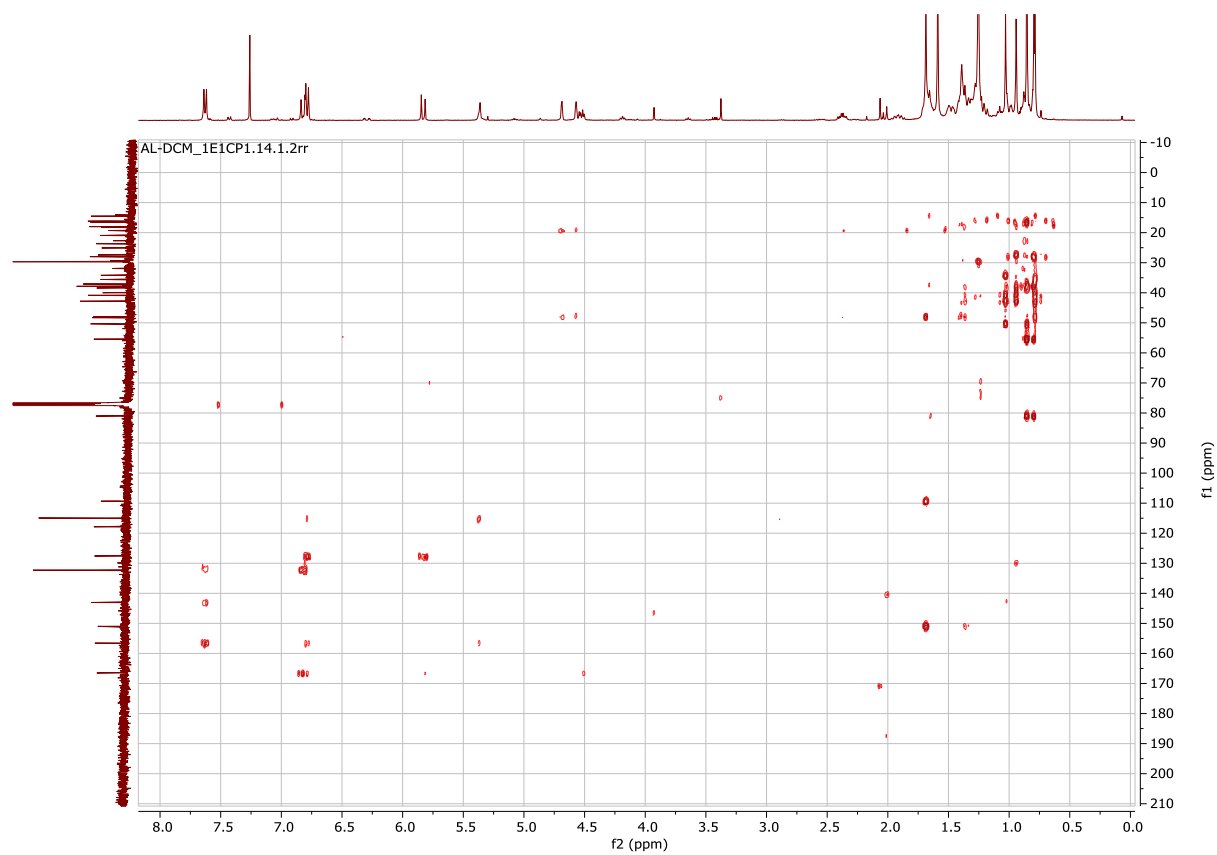

Figure S7 - COSY spectrum of 3 $\beta$ -Z-coumaroyl lupeol **2** (unpurified) (CDCl<sub>3</sub>)

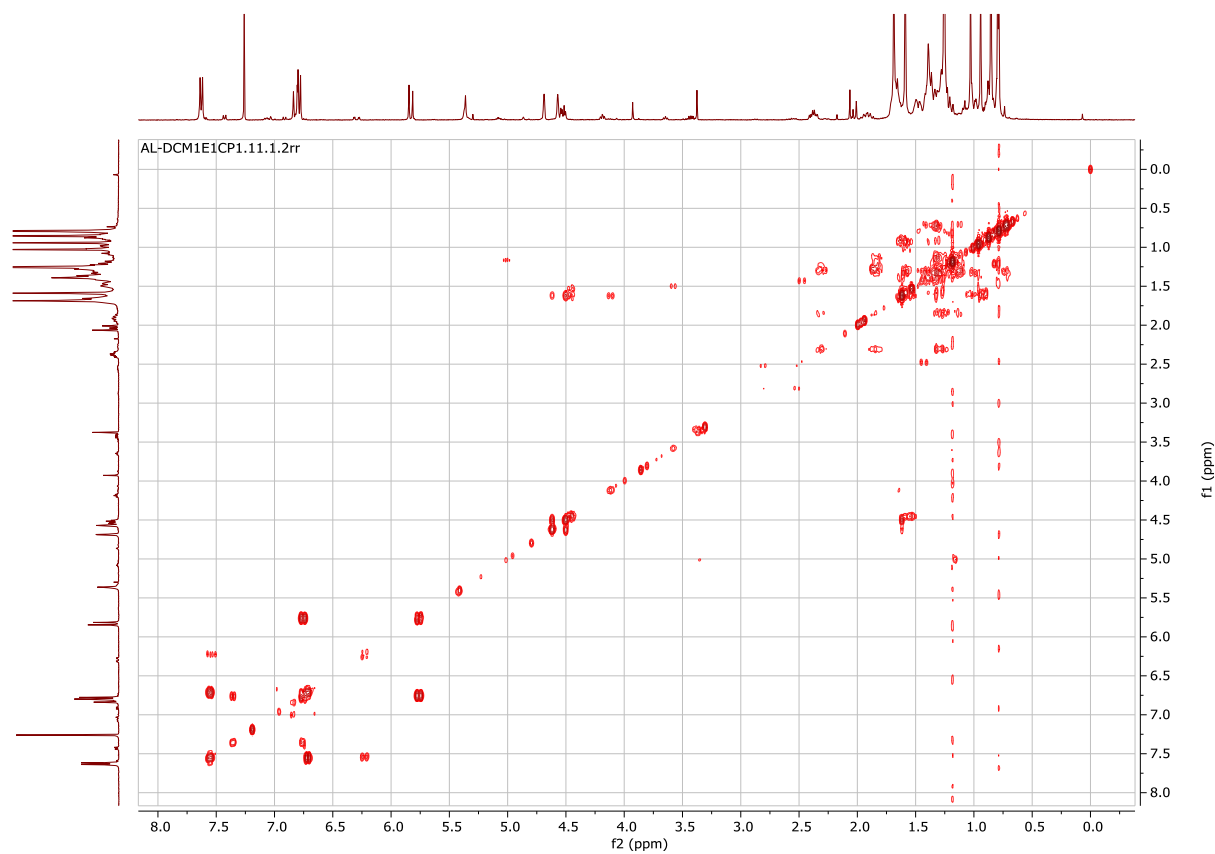

Figure S8 - NOESY spectrum of 3 $\beta$ -Z-coumaroyl lupeol **2** (unpurified) (CDCl<sub>3</sub>)

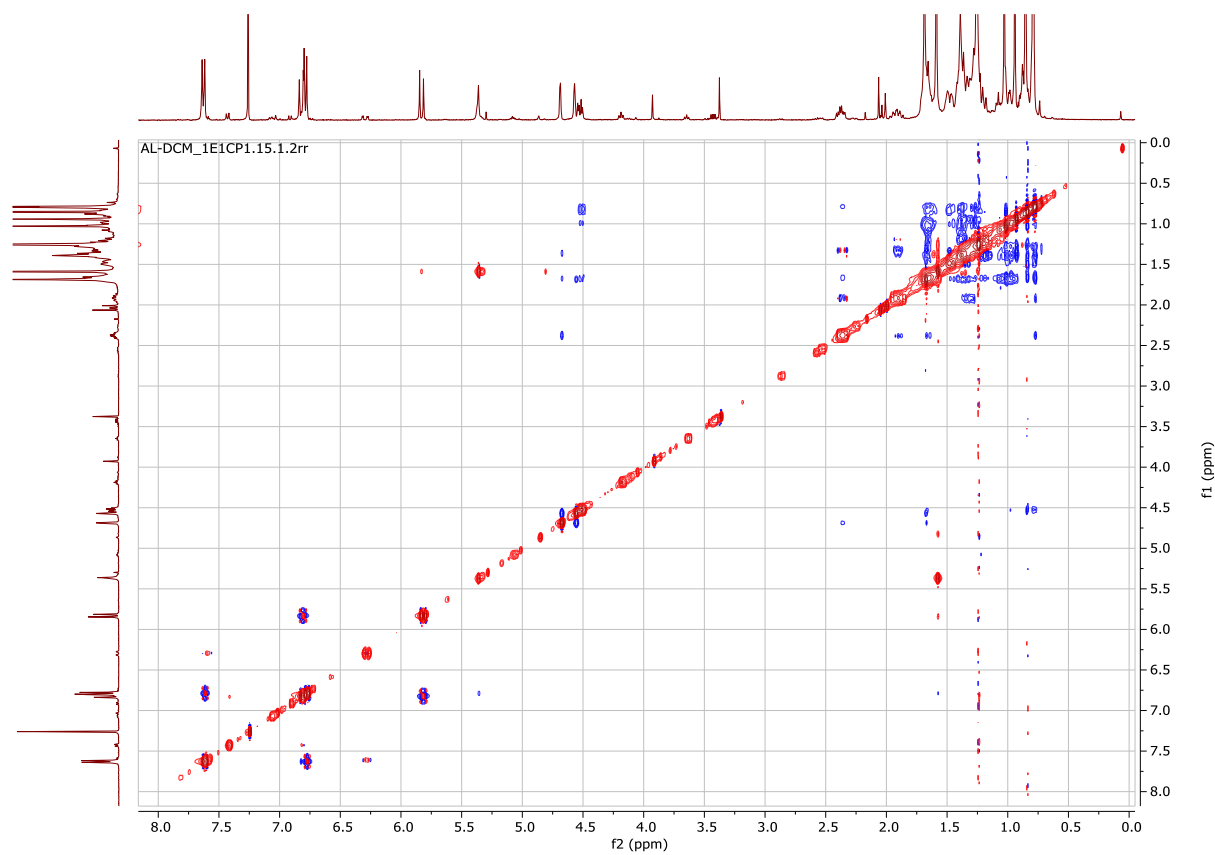

Figure S9 -  $^1\text{H}$  NMR spectrum of  $3\beta$ -*E*-coumaroyl lupeol (dioslupecin A) **3** (unpurified) ( $\text{CDCl}_3$ , 400 MHz)

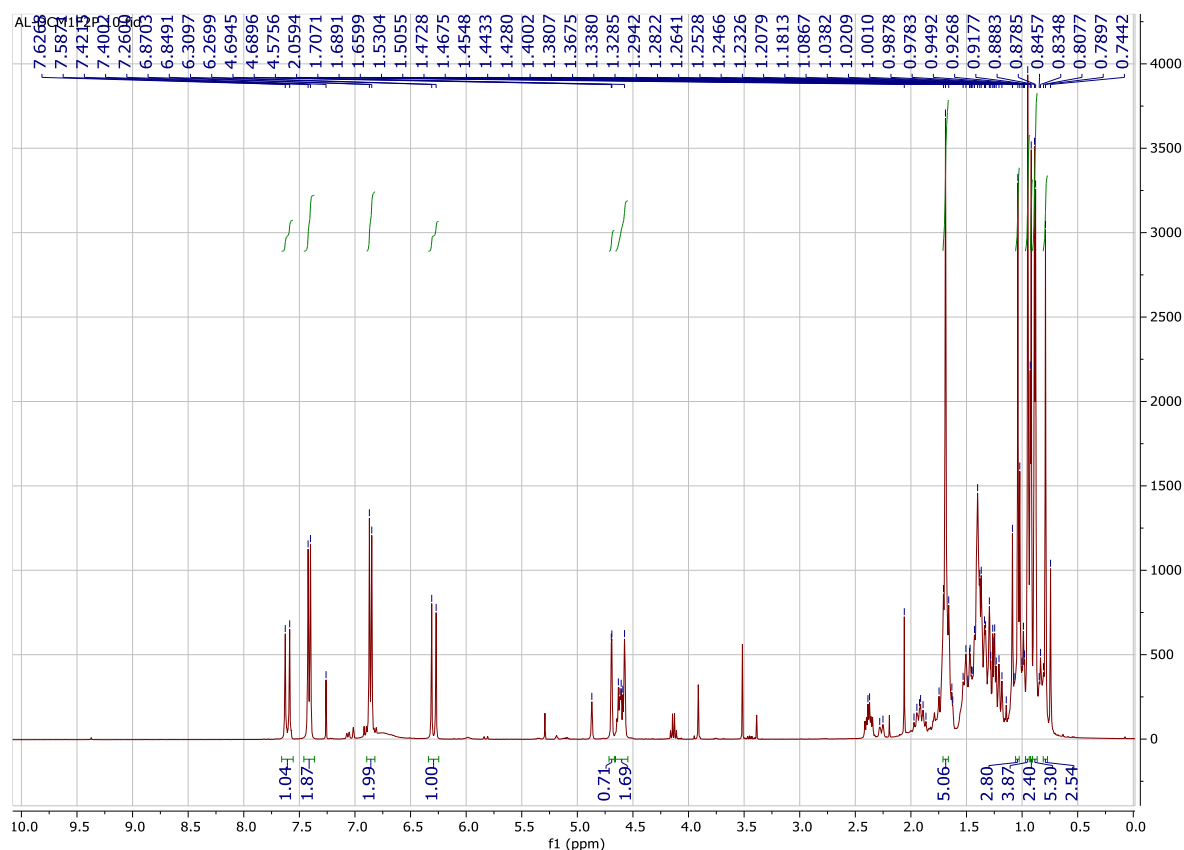

Figure S10 -  $^{13}\text{C}$  NMR spectrum of  $3\beta$ -*E*-coumaroyl lupeol (dioslupecin A) **3** (unpurified) ( $\text{CDCl}_3$ , 100 MHz)

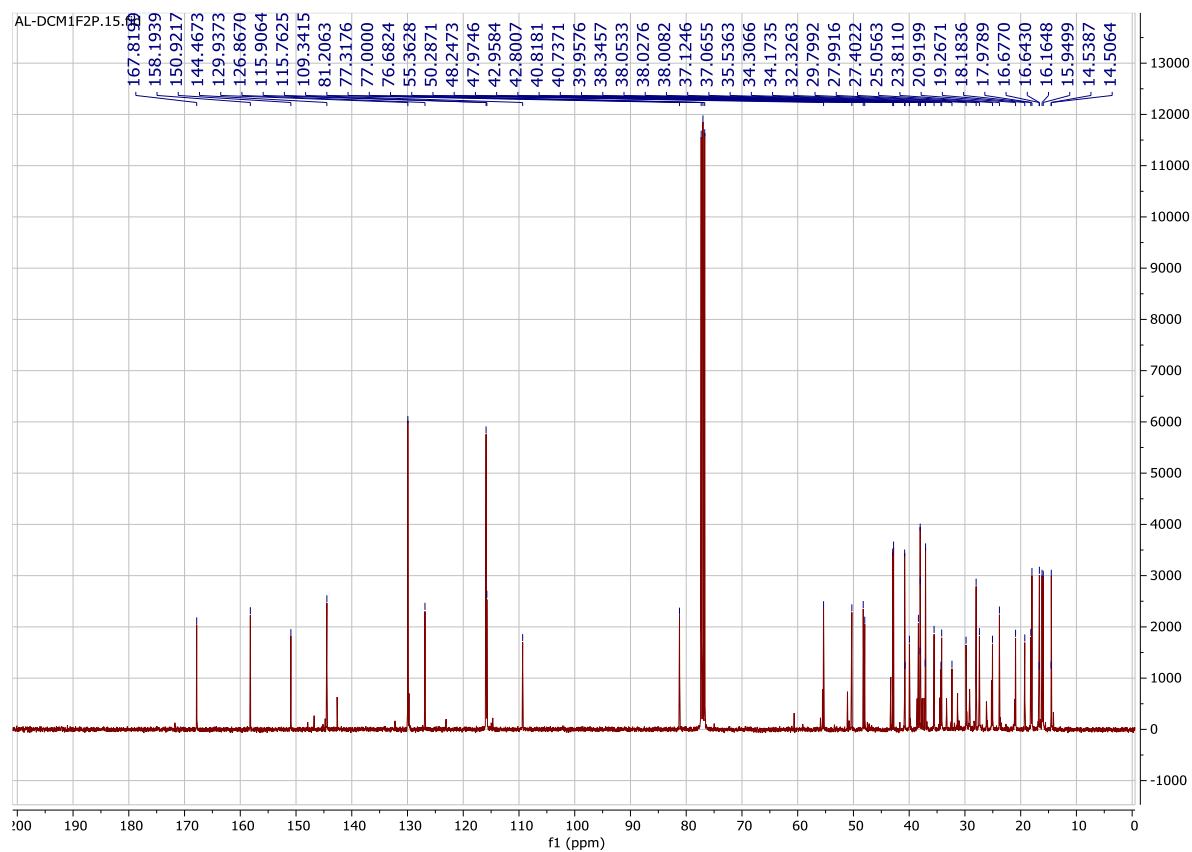

Figure S11 - DEPT135 spectrum of 3 $\beta$ -*E*-coumaroyl lupeol (dioslupecin A) (unpurified) **3**

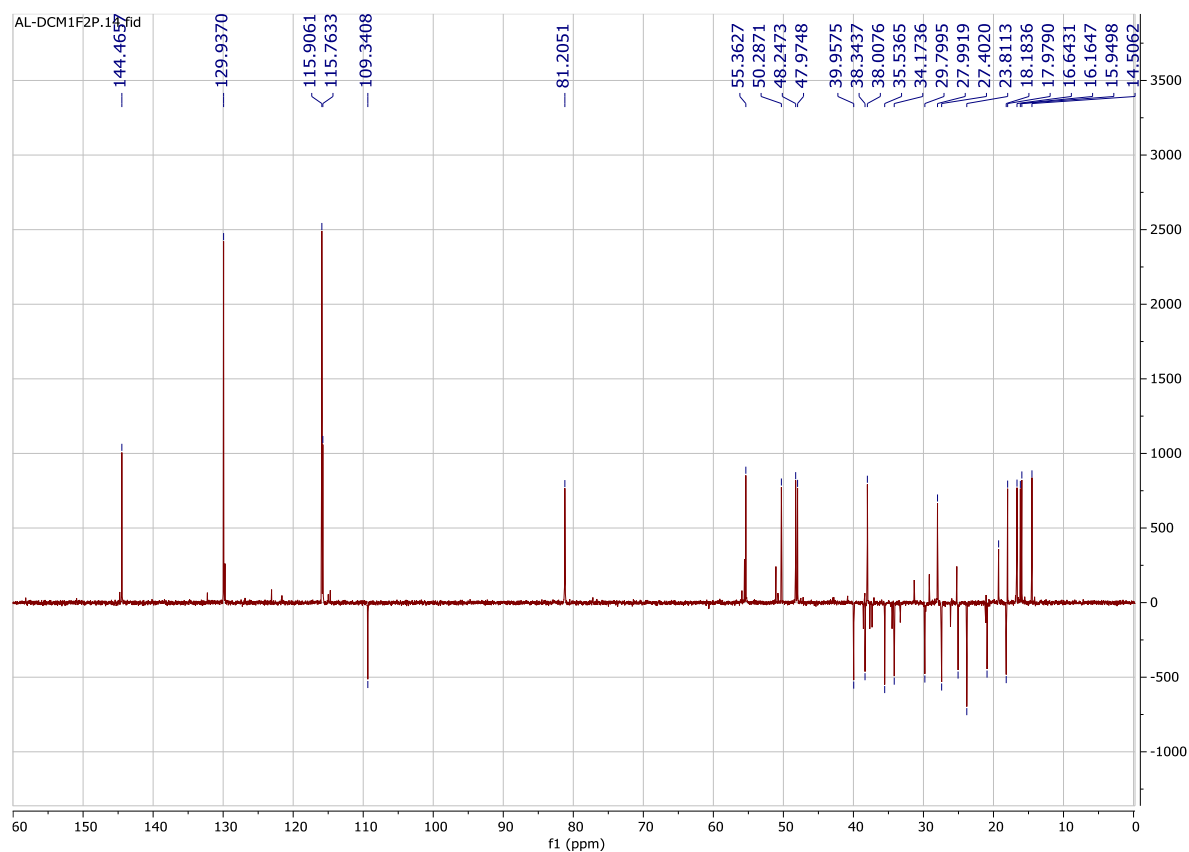

Figure S12 - HSQC spectrum of 3 $\beta$ -*E*-coumaroyl lupeol (dioslupecin A) (unpurified) **3**

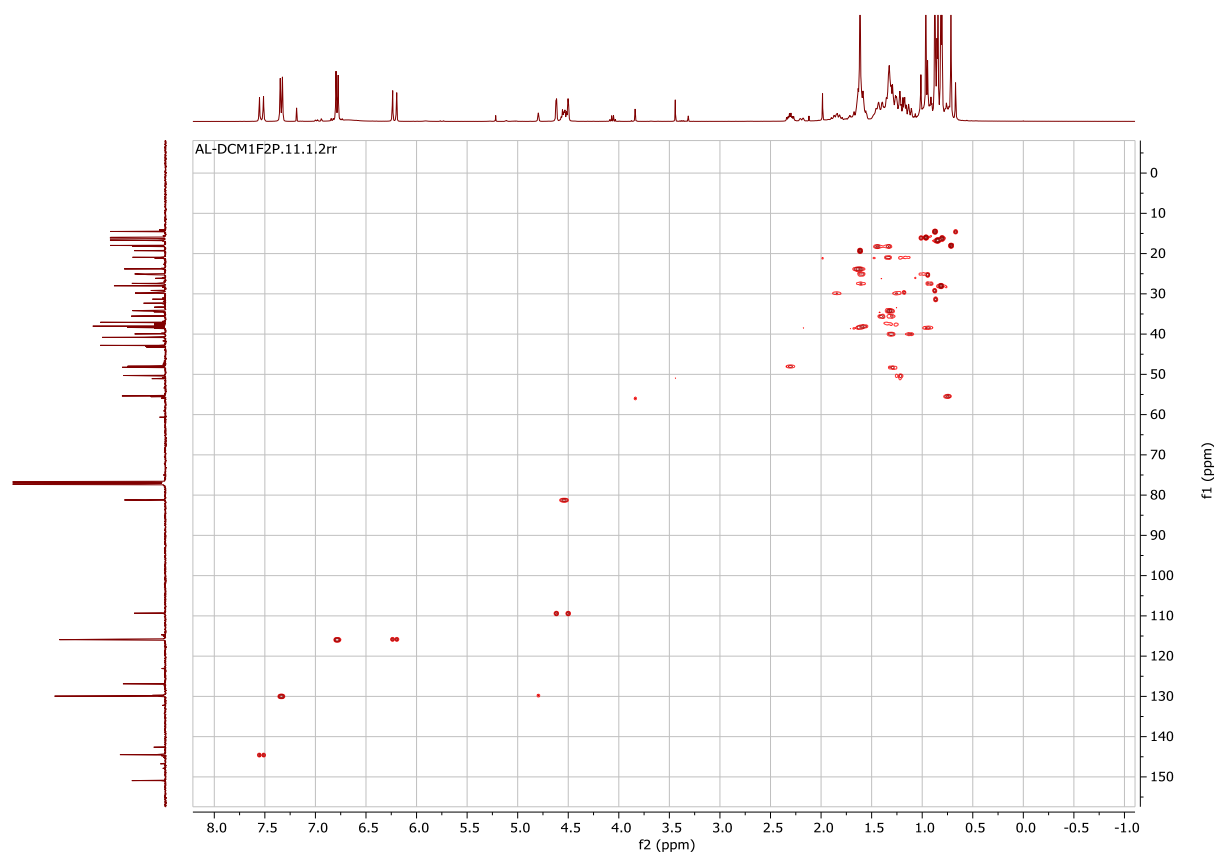



Figure S13 - HMBC spectrum of 3 $\beta$ -*E*-coumaroyl lupeol (dioslupecin A) (unpurified) **3**

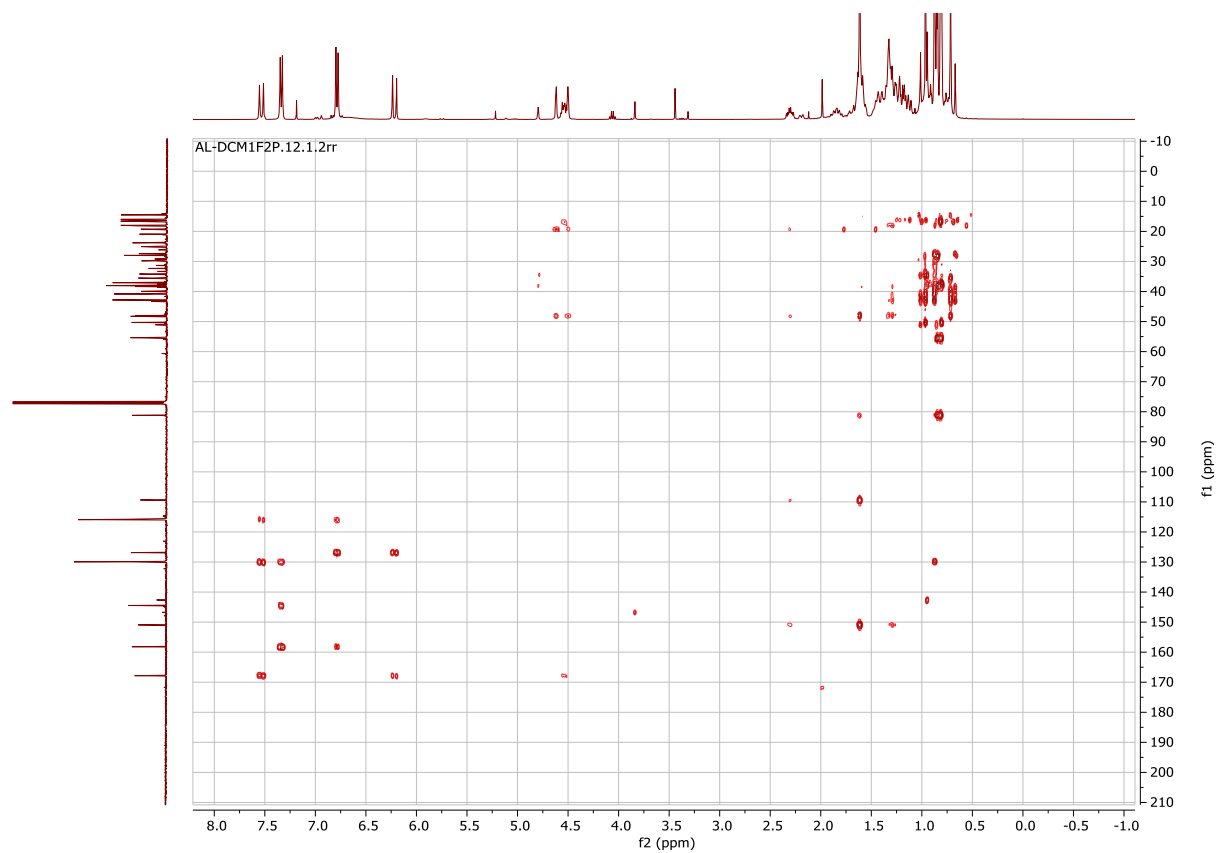

Figure S14 - NOESY spectrum of 3 $\beta$ -*E*-coumaroyl lupeol (dioslupecin A) (unpurified) **3**

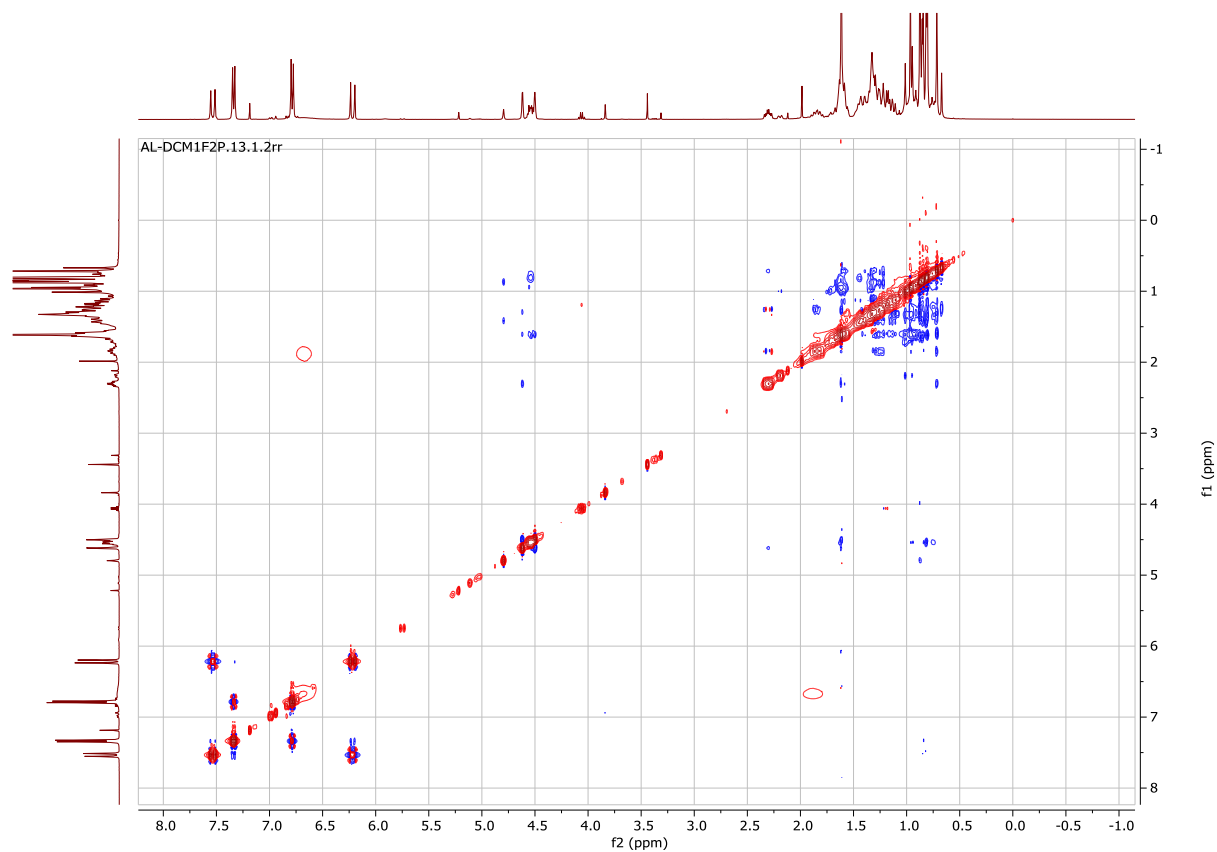

Figure S15 -  $^1\text{H}$  NMR spectrum of the mixture of 3 $\beta$ -*Z*-coumaroyl lupeol **2** and 3 $\beta$ -*E*-coumaroyl lupeol **3** (1.0:2.0) ( $\text{CDCl}_3$ , 500 MHz)

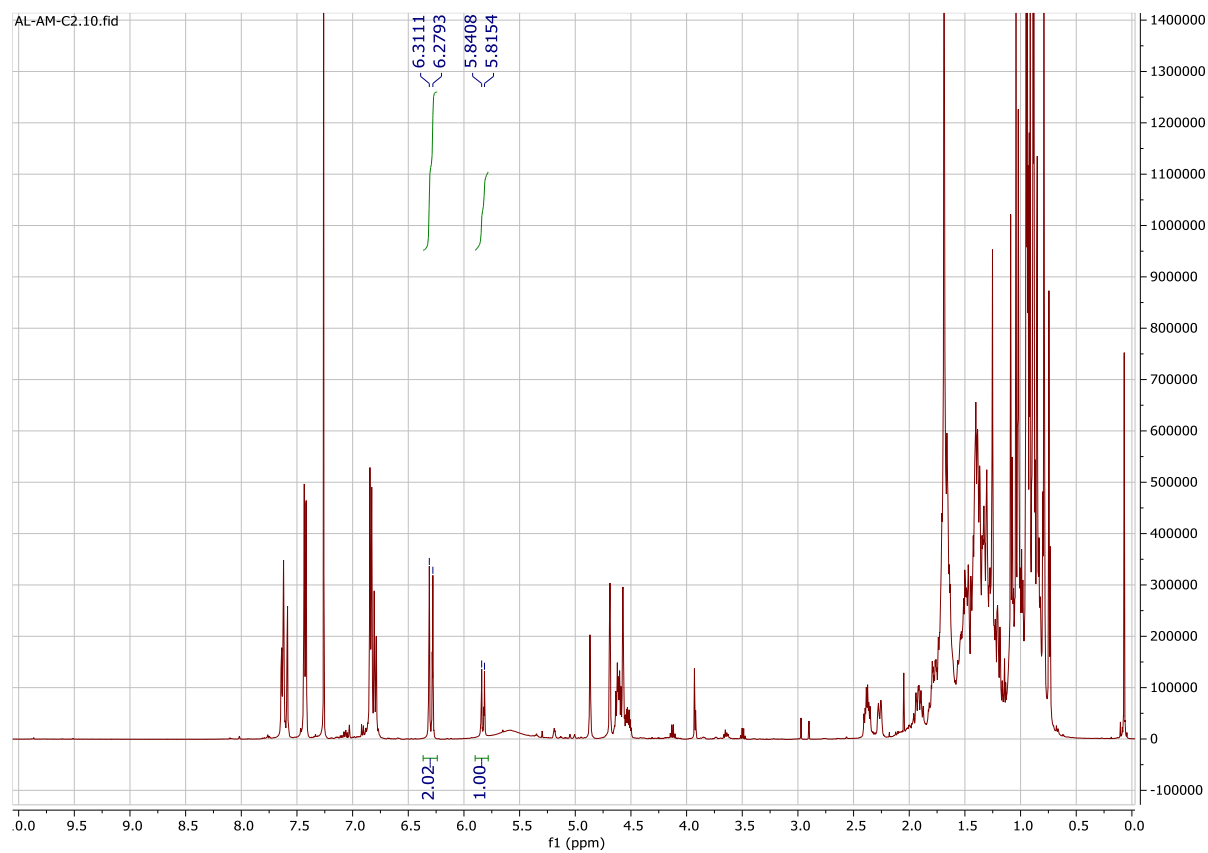

Figure S16 - GC-FID chromatogram of the mixture of 3 $\beta$ -Z-coumaroyl lupeol **2** and 3 $\beta$ -E-coumaroyl lupeol **3** (1.0:1.6)

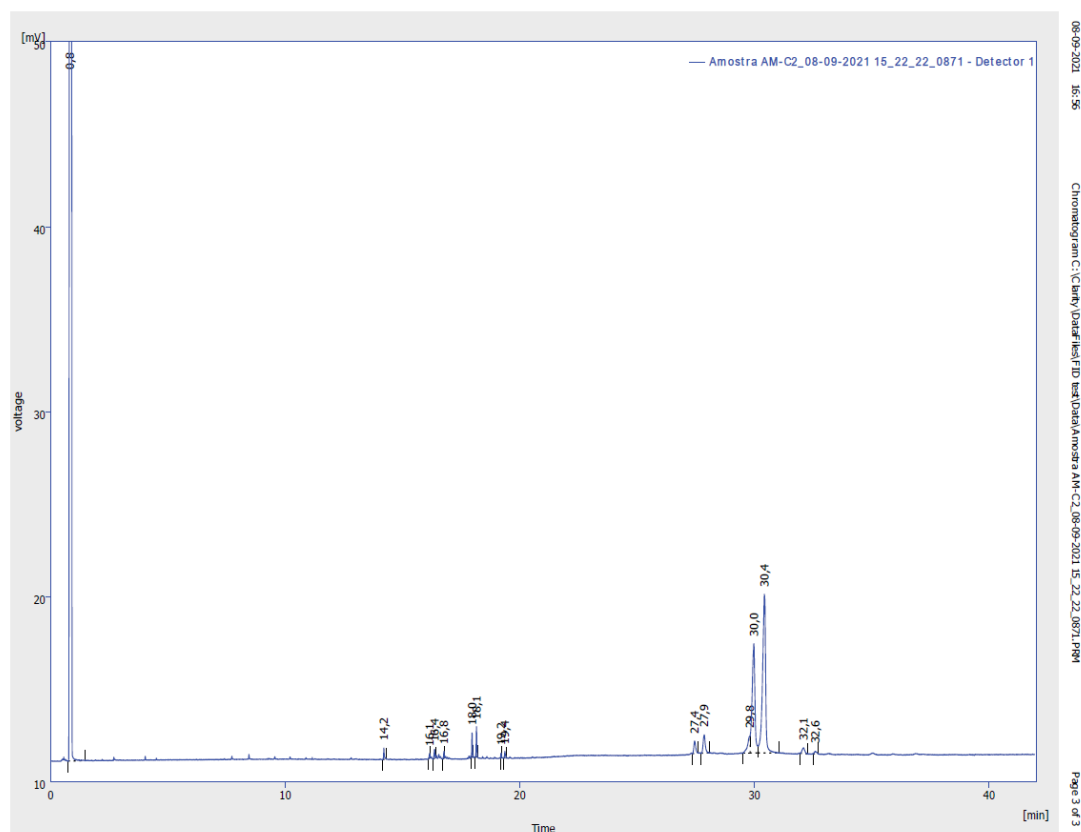

All Signals Result Table (Uncal - Amostra AM-C2\_08-09-2021 15\_22\_22\_0871)

|                      | Reten. Time<br>[min] | Area<br>[mV.s] | Height<br>[mV] | Area<br>[%] | Height<br>[%] |
|----------------------|----------------------|----------------|----------------|-------------|---------------|
| 1                    | 0,805                | 69365,755      | 49262,547      | 99,77       | 99,95         |
| 2                    | 14,200               | 1,318          | 0,615          | 0,00        | 0,00          |
| 3                    | 16,145               | 0,541          | 0,249          | 0,00        | 0,00          |
| 4                    | 16,362               | 1,180          | 0,487          | 0,00        | 0,00          |
| 5                    | 16,758               | 0,709          | 0,372          | 0,00        | 0,00          |
| 6                    | 17,958               | 2,398          | 1,301          | 0,00        | 0,00          |
| 7                    | 18,148               | 3,096          | 1,645          | 0,00        | 0,00          |
| 8                    | 19,192               | 0,478          | 0,255          | 0,00        | 0,00          |
| 9                    | 19,358               | 0,907          | 0,366          | 0,00        | 0,00          |
| 10                   | 27,445               | 3,672          | 0,677          | 0,01        | 0,00          |
| 11                   | 27,855               | 6,273          | 0,987          | 0,01        | 0,00          |
| 12                   | 29,802               | 6,245          | 0,919          | 0,01        | 0,00          |
| 13                   | 29,970               | 50,427         | 5,903          | 0,07        | 0,01          |
| 14                   | 30,420               | 79,262         | 8,577          | 0,11        | 0,02          |
| 15                   | 32,090               | 2,551          | 0,323          | 0,00        | 0,00          |
| 16                   | 32,590               | 0,960          | 0,143          | 0,00        | 0,00          |
| All Signals<br>Total |                      | 69525,772      | 49285,366      | 100,00      | 100,00        |

Chromatogram Comments - Amostra AM-C2\_08-09-2021 15\_22\_22\_0871

Figure S17 -  $^1\text{H}$  NMR spectrum of the mixture of 3 $\beta$ -Z-coumaroyl lupeol **2** and 3 $\beta$ -E-coumaroyl lupeol **3** (1.0:4.4) ( $\text{CDCl}_3$ , 500 MHz)

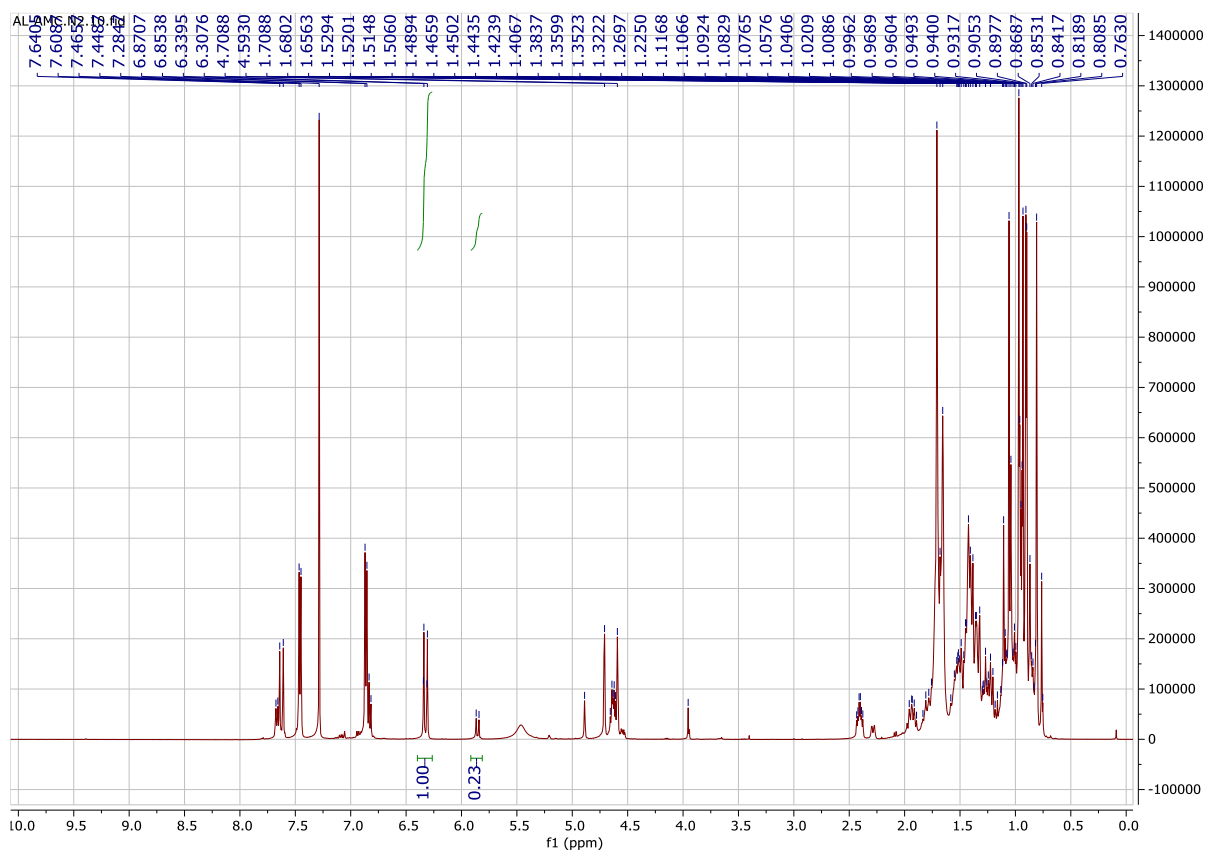

Figure S18 -  $^1\text{H}$  NMR spectrum of kolavice acid 15-methyl ester **4** ( $\text{CDCl}_3$ , 500 MHz)

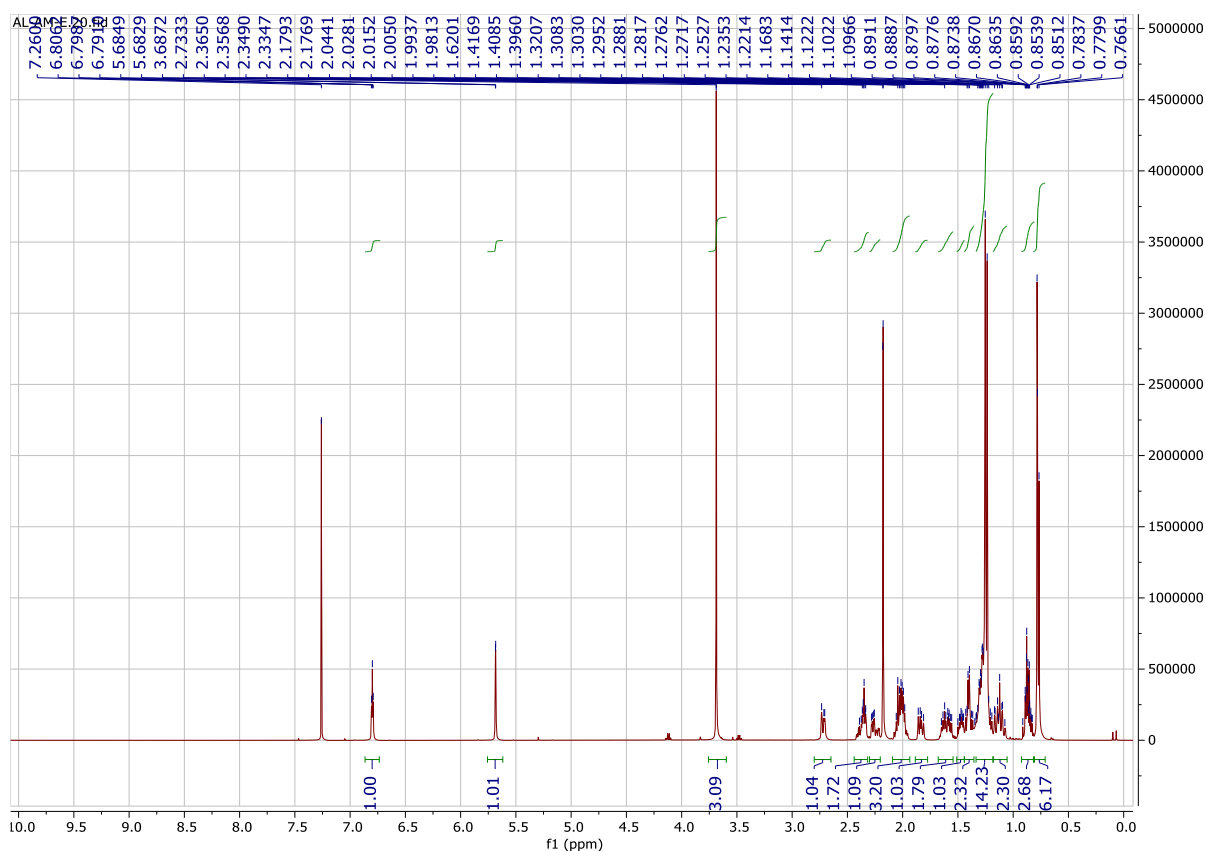

Figure S19 -  $^{13}\text{C}$  NMR spectrum of kolavic acid 15-methyl ester **4** ( $\text{CDCl}_3$ , 125 MHz)

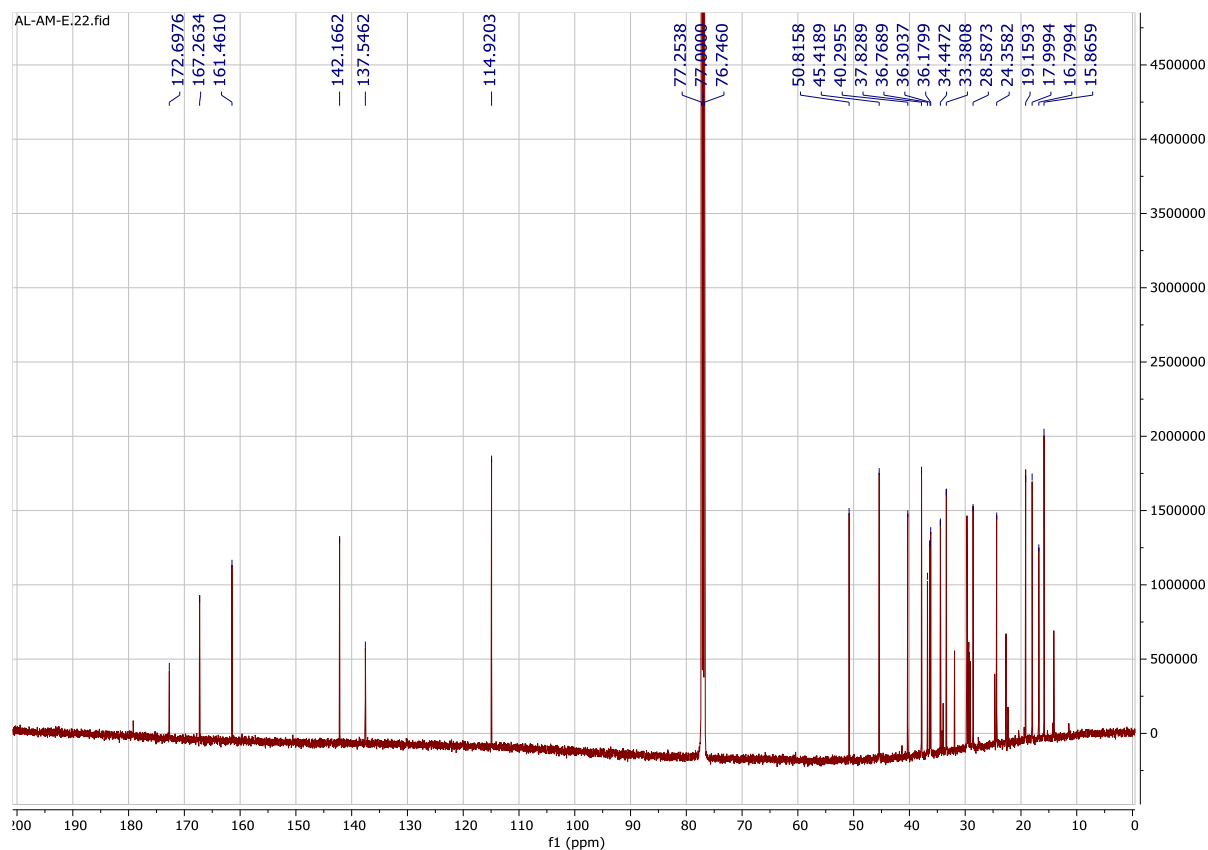

Figure S20 - DEPT135 spectrum of kolavic acid 15-methyl ester **4** ( $\text{CDCl}_3$ )

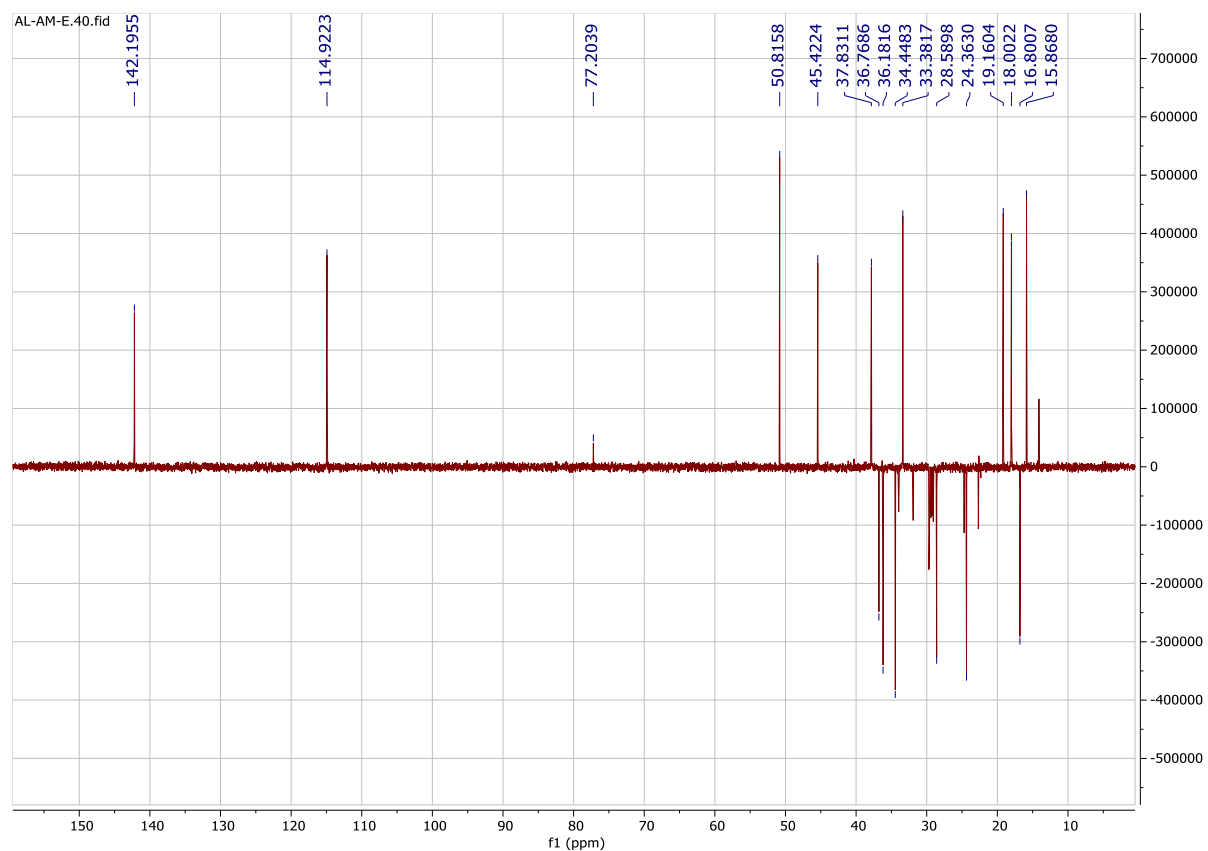

Figure S21 - HSQC spectrum of kolavic acid 15-methyl ester **4** (CDCl<sub>3</sub>)

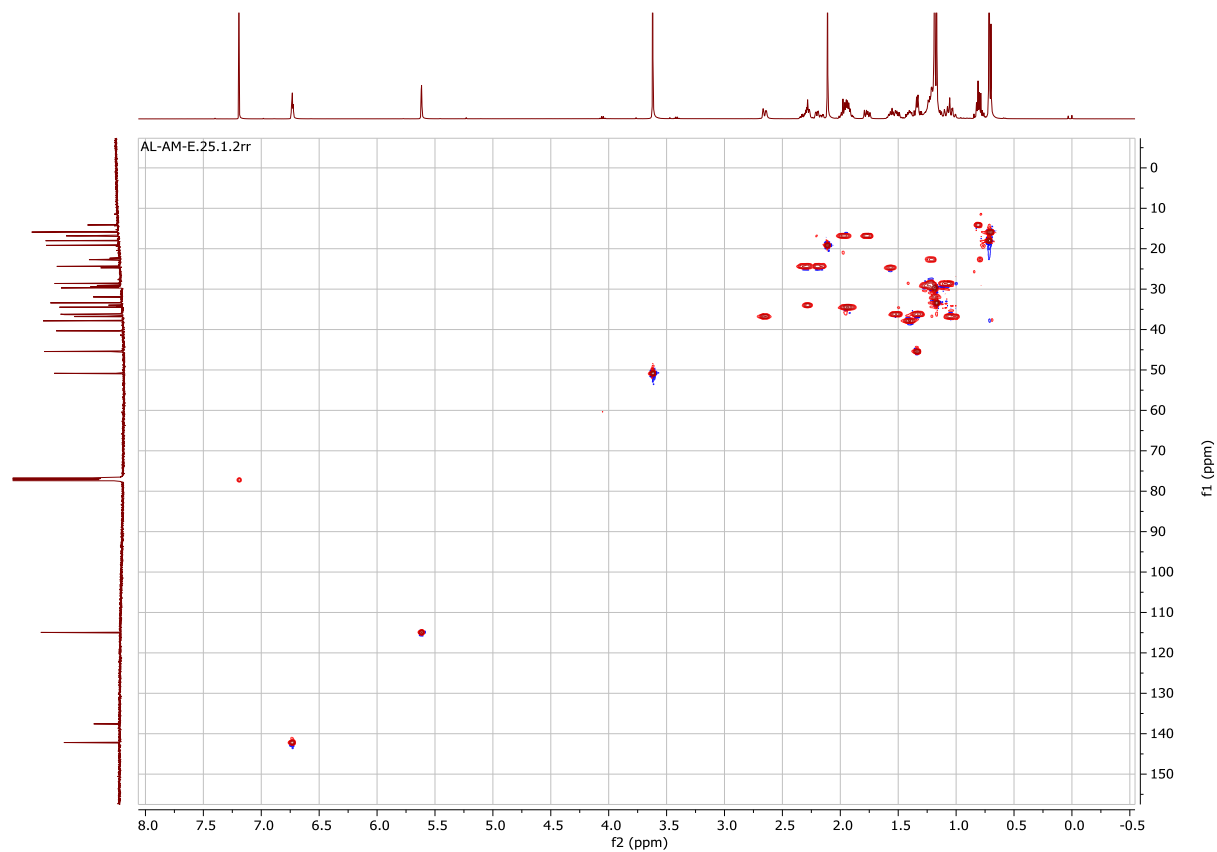

Figure S22 - HMBC spectrum of kolavic acid 15-methyl ester **4** (CDCl<sub>3</sub>)

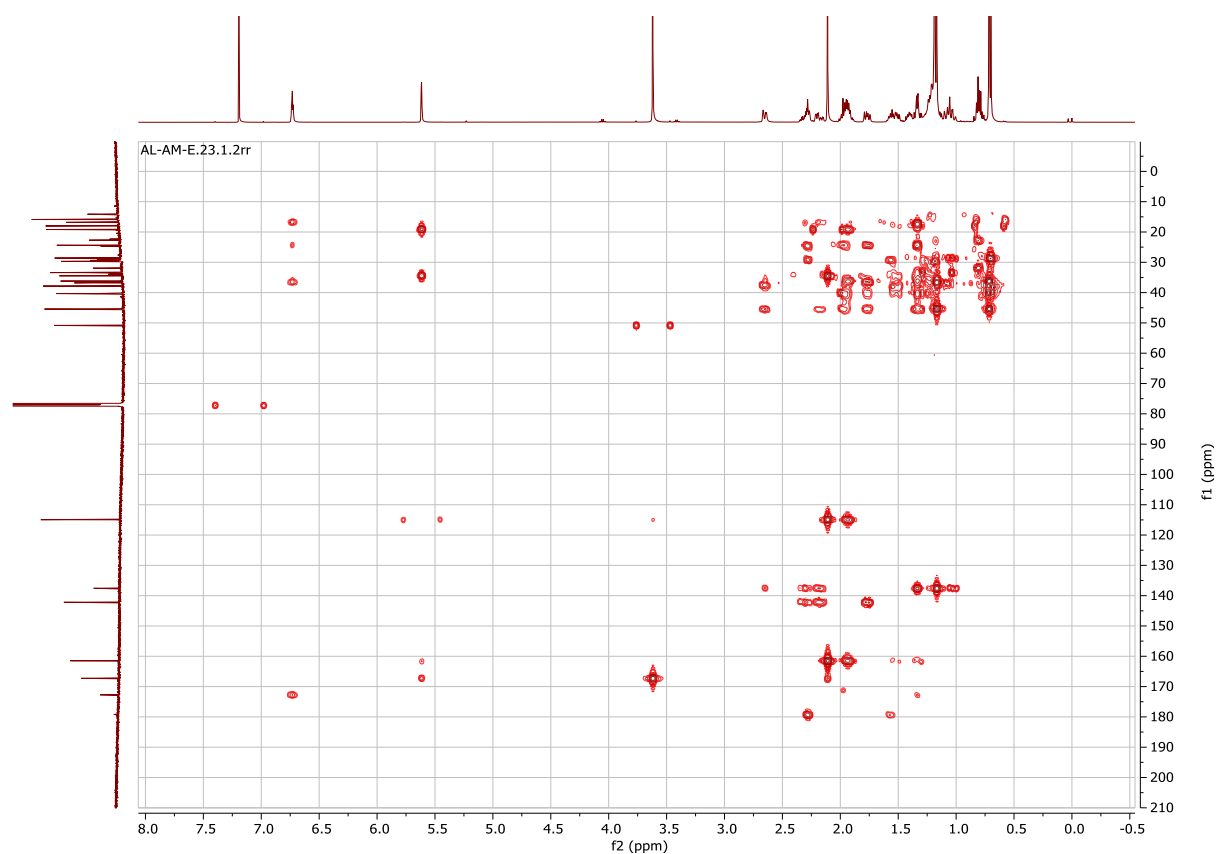

Figure S23 - COSY spectrum of kolavic acid 15-methyl ester **4** ( $\text{CDCl}_3$ )

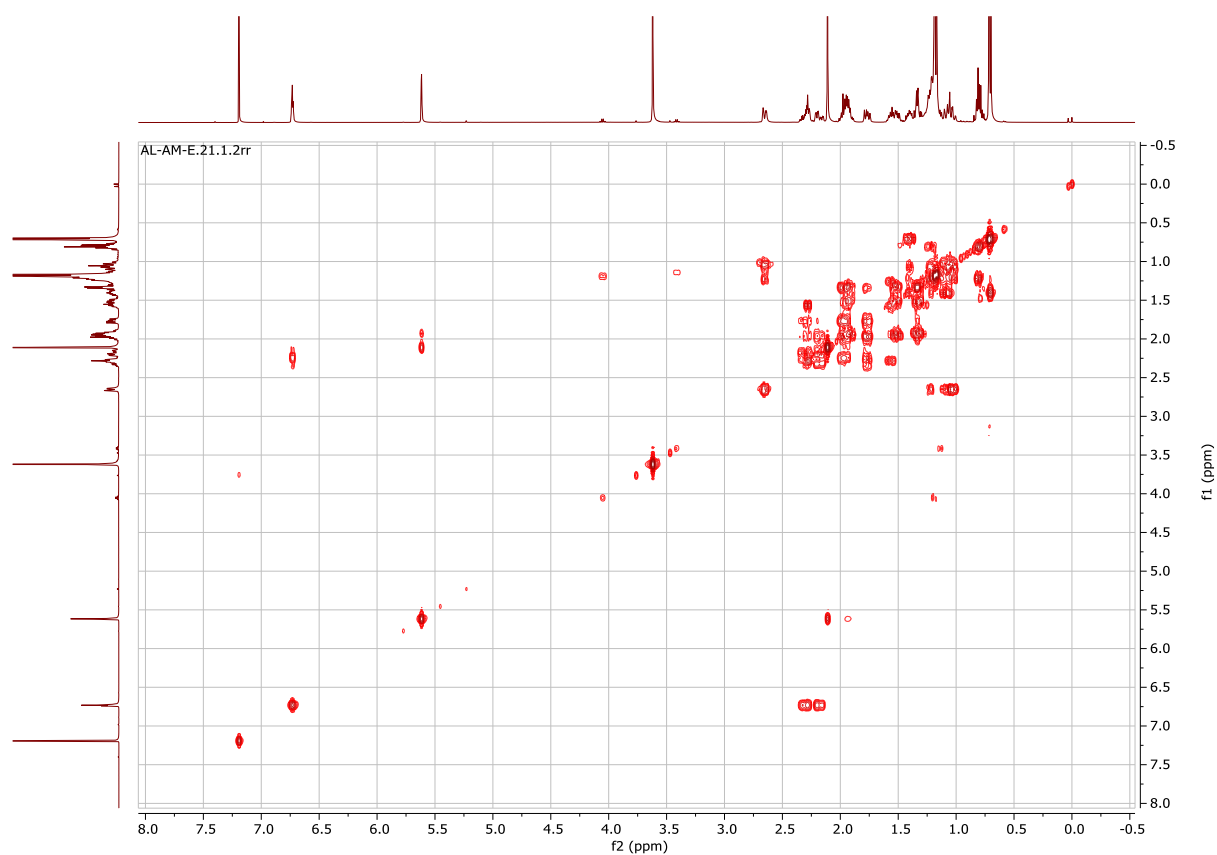

Figure S24 - NOESY spectrum of kolavic acid 15-methyl ester **4** ( $\text{CDCl}_3$ )

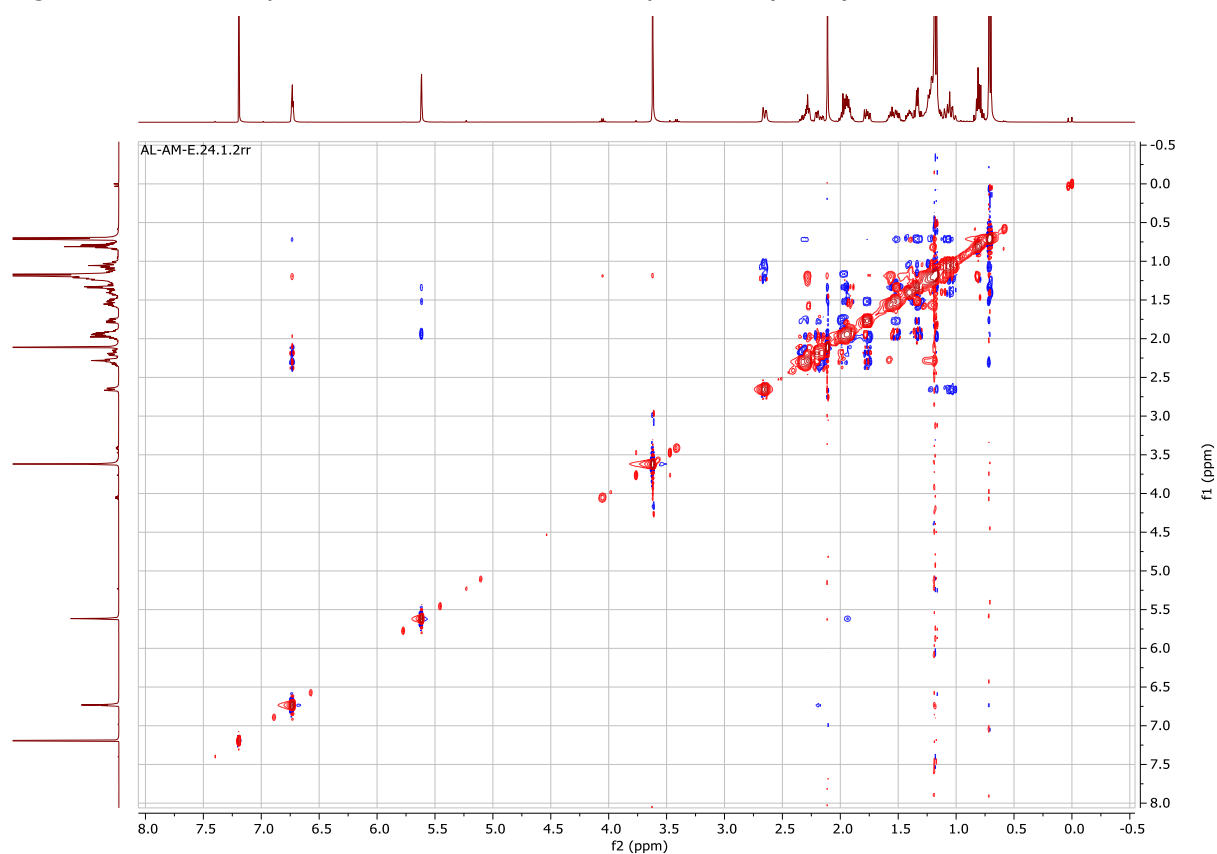

Figure S25 - ESI-MS spectra of kolavic acid 15-methyl ester **4**

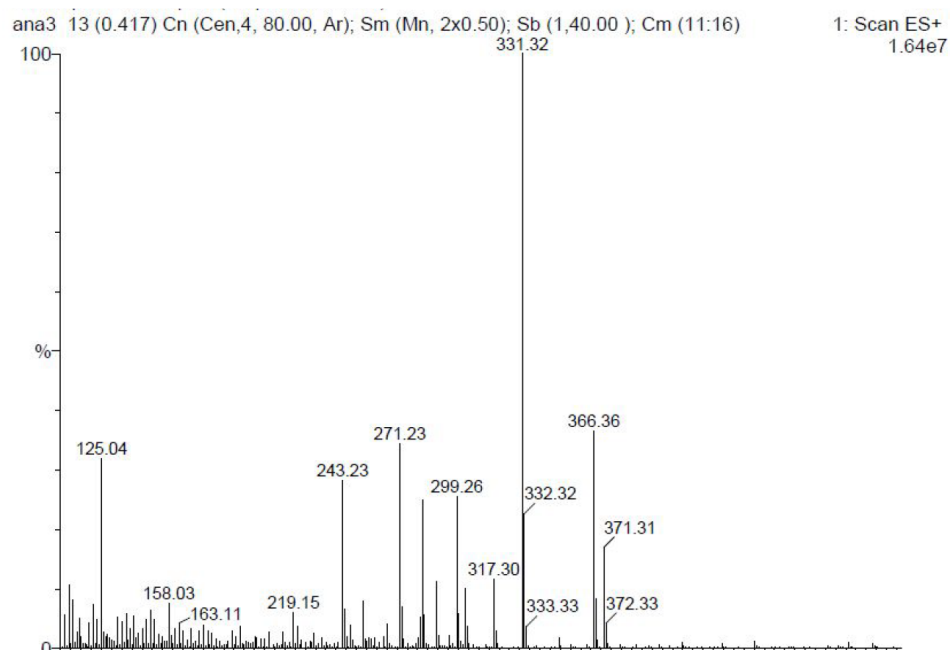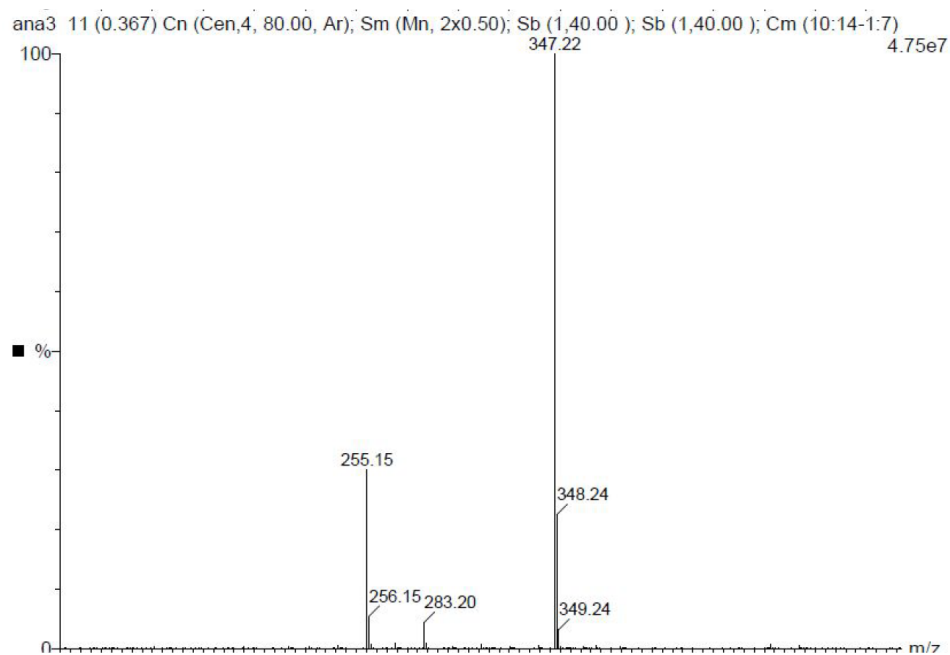



Figure S26 -  $^1\text{H}$  NMR spectrum of vomifoliol (blumenol A) **5** (unpurified) ( $\text{CDCl}_3$ , 500 MHz)

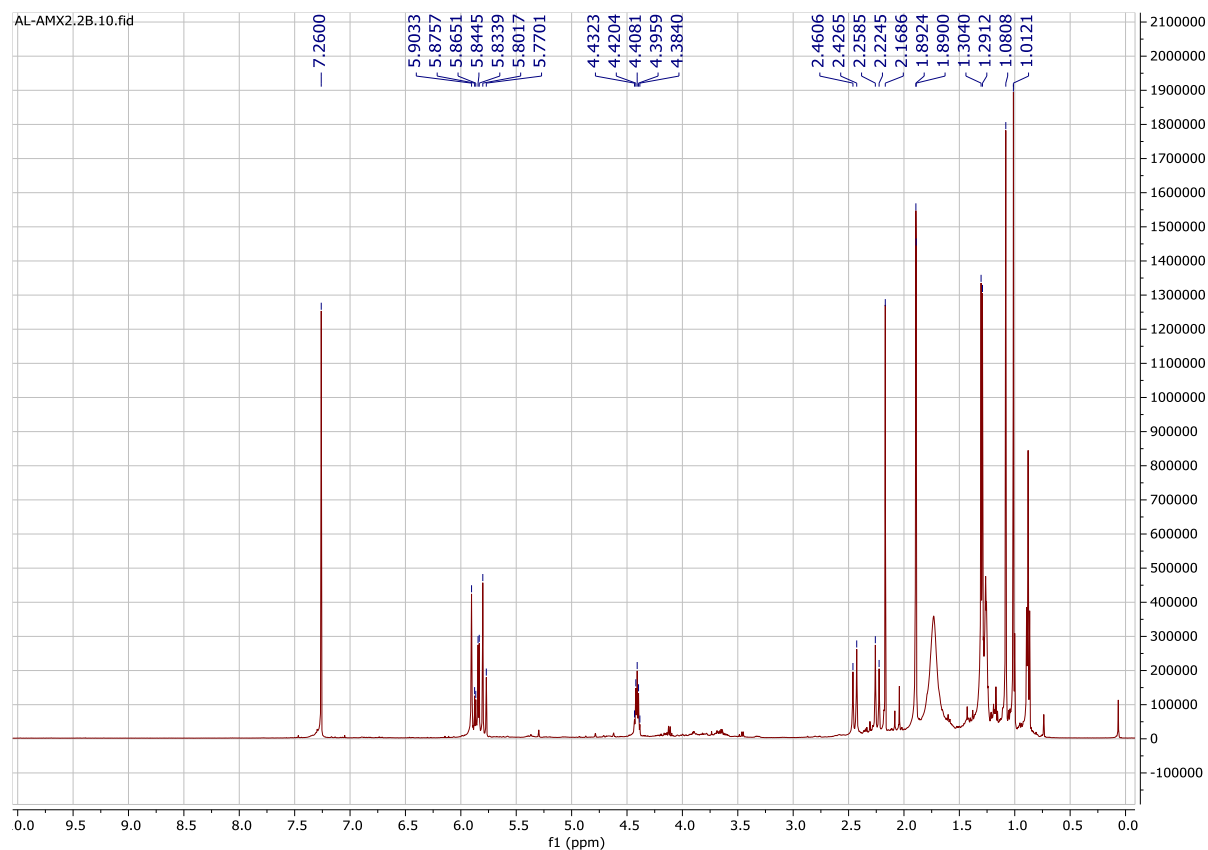

Figure S27 -  $^{13}\text{C}$  NMR spectrum of vomifoliol (blumenol A) **5** (unpurified) ( $\text{CDCl}_3$ , 125 MHz)

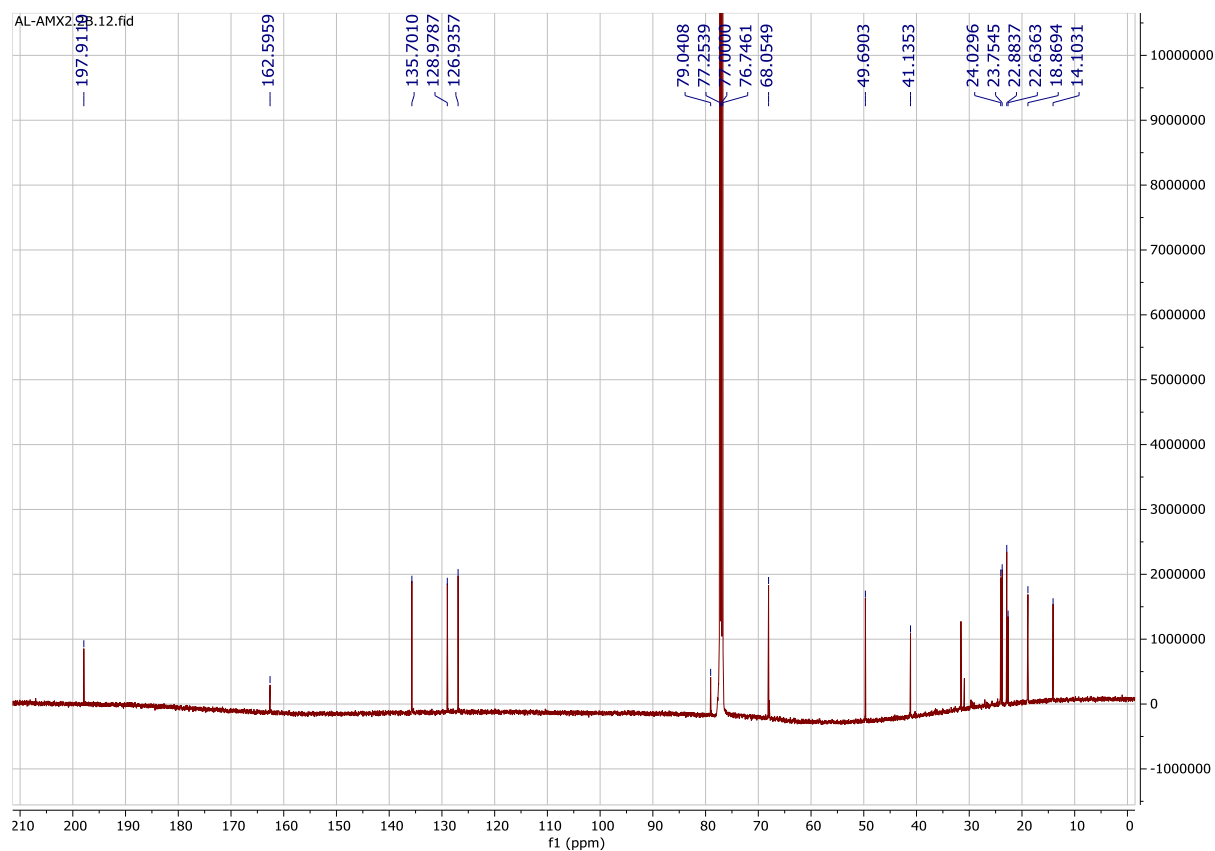

Figure S28 - DEPT135 spectrum of vomifoliol (blumenol A) **5** (unpurified) (CDCl<sub>3</sub>)

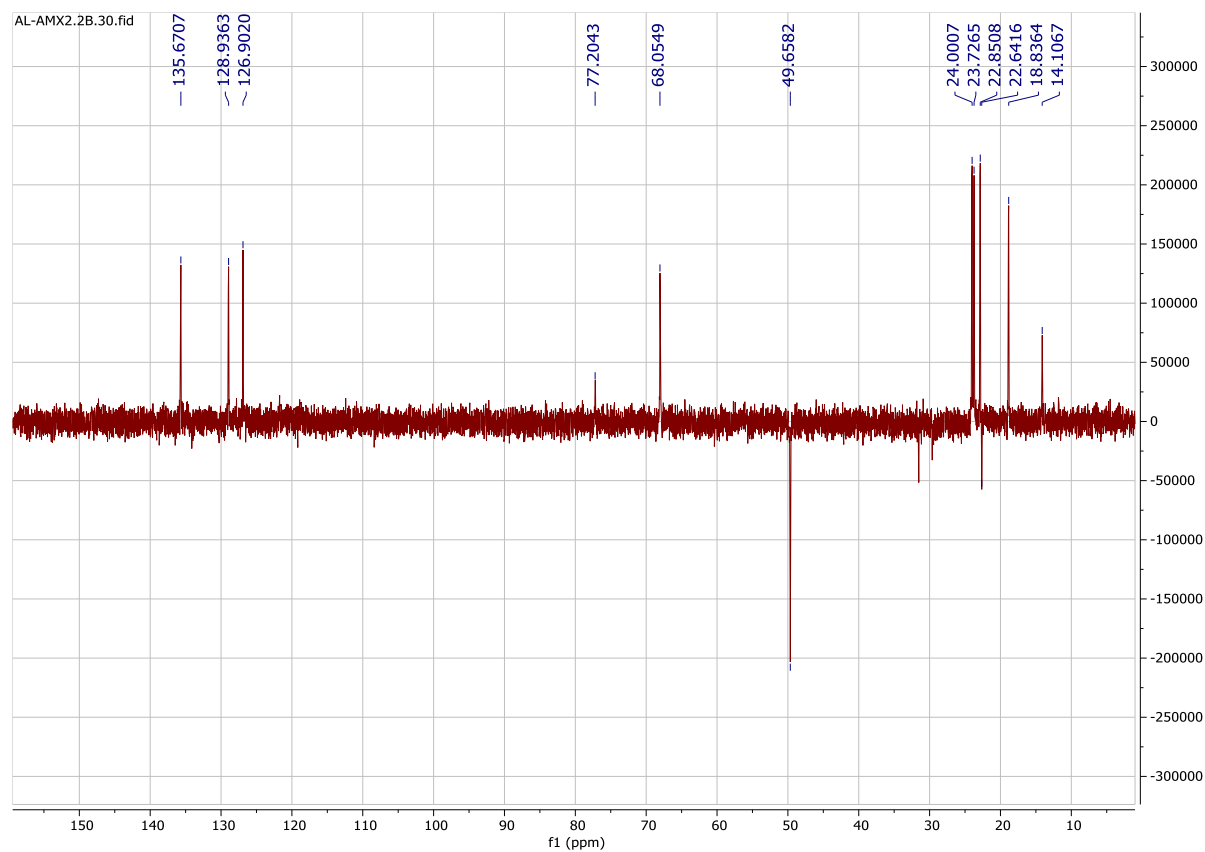

Figure S29 - HSQC spectrum of vomifoliol (blumenol A) **5** (unpurified) (CDCl<sub>3</sub>)

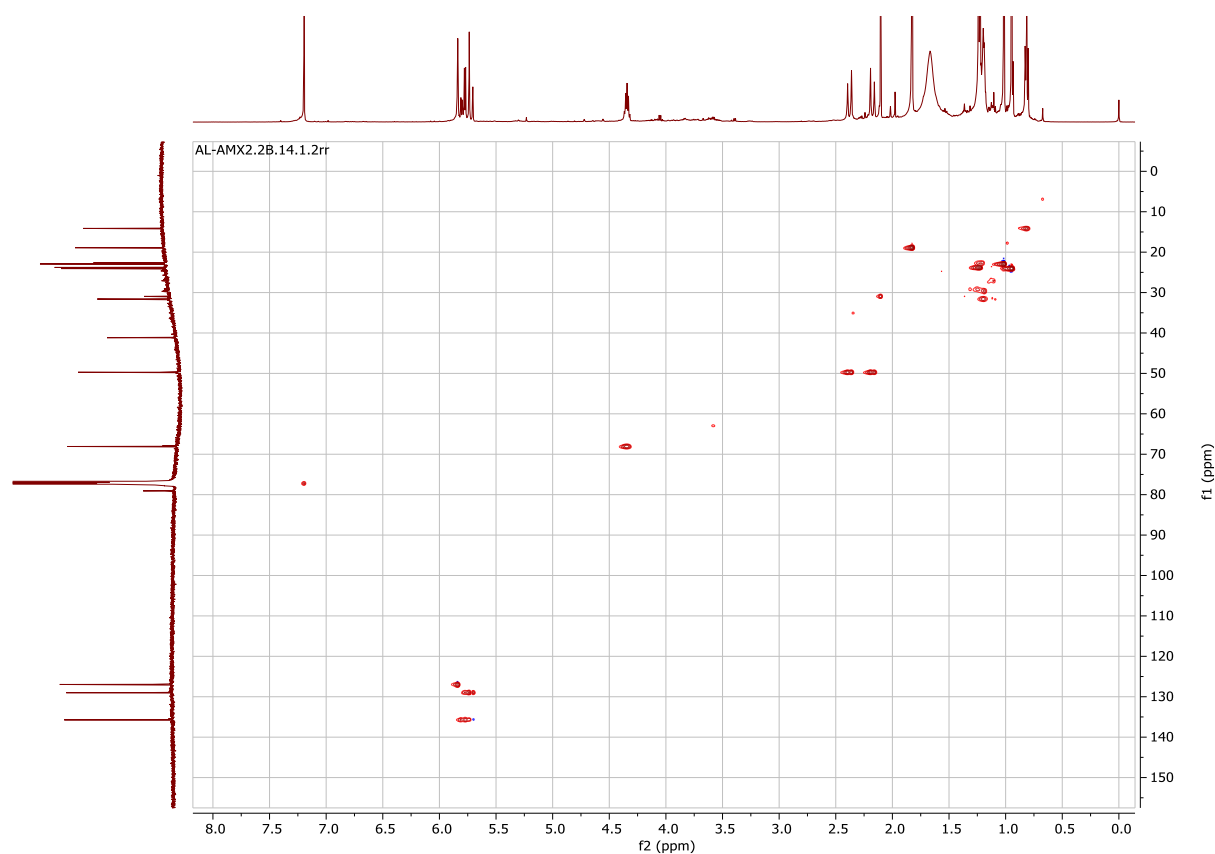

Figure S30 - HMBC spectrum of vomifoliol (blumenol A) **5** (unpurified) ( $\text{CDCl}_3$ )

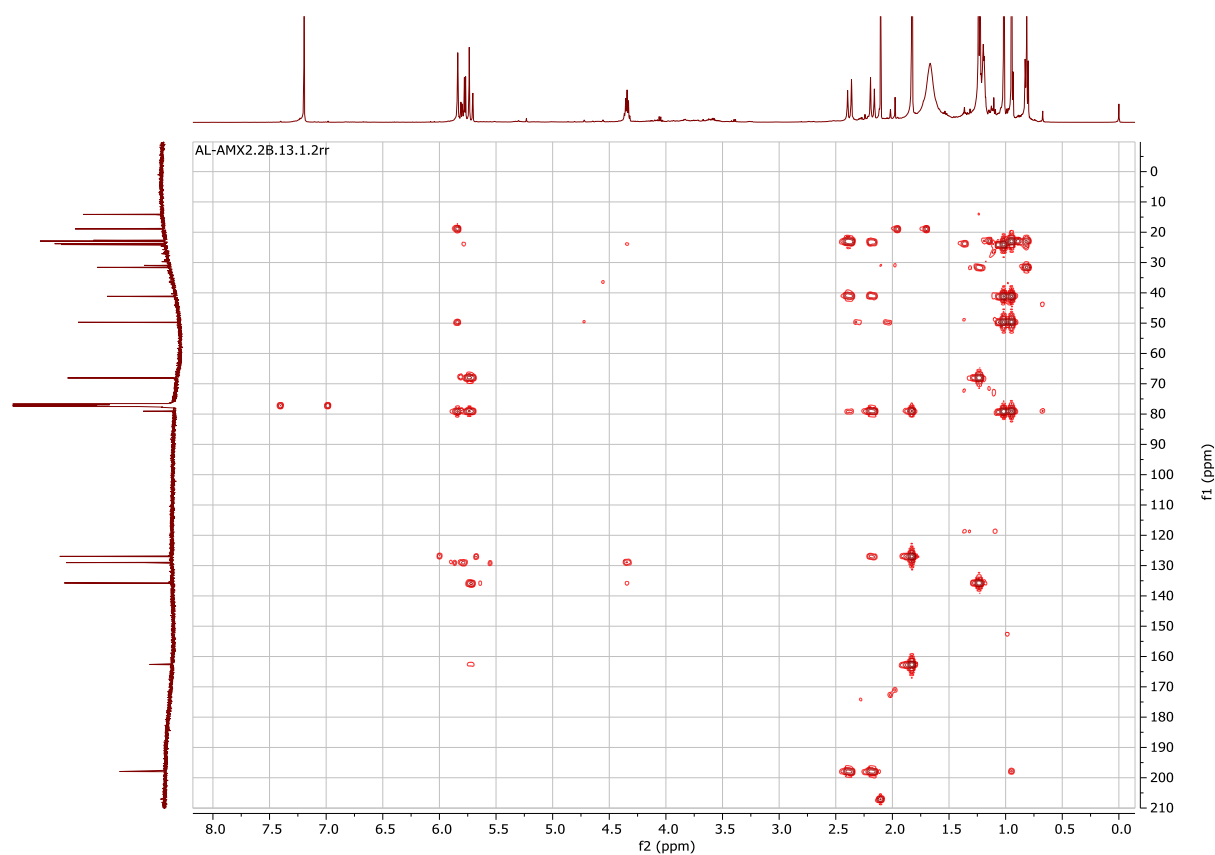

Figure S31 - COSY spectrum of vomifoliol (blumenol A) **5** (unpurified) ( $\text{CDCl}_3$ )

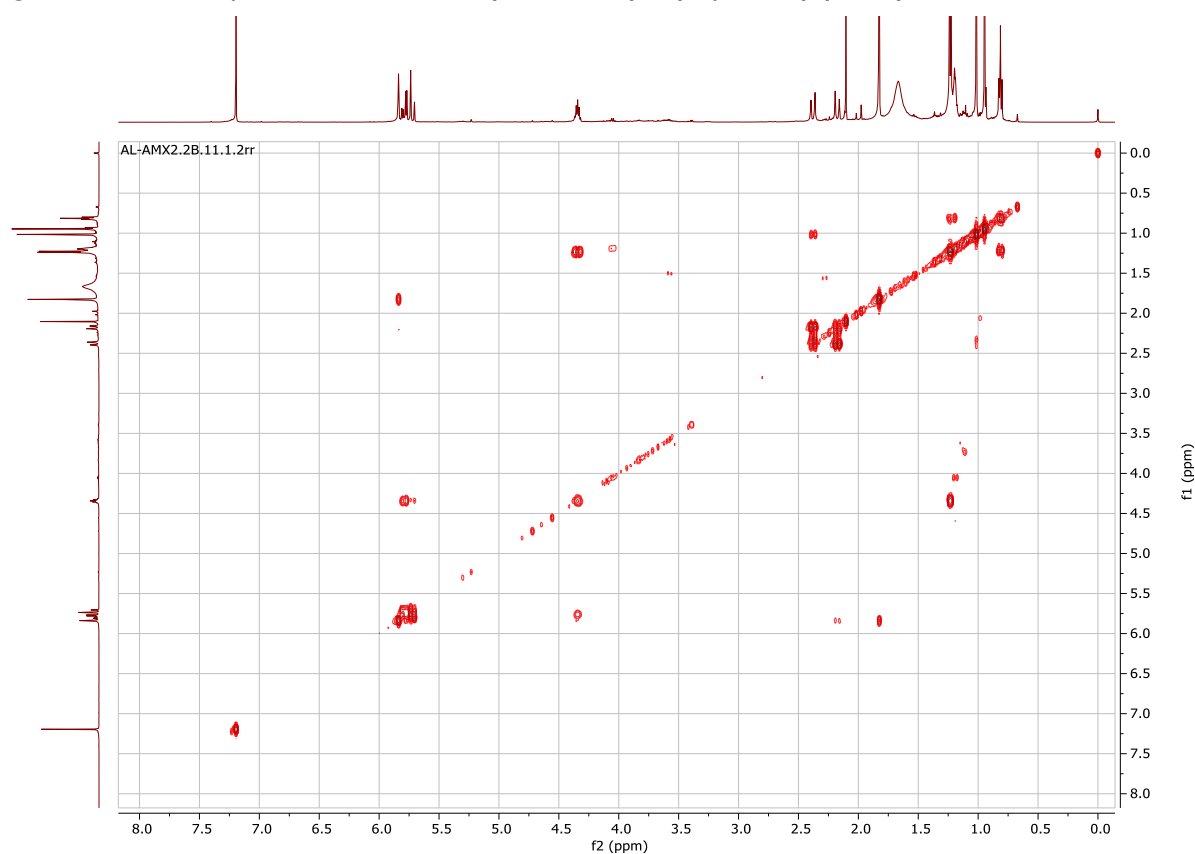

Figure S32 - ESI-MS spectrum of vomifoliol (blumenol A) **5** (unpurified)

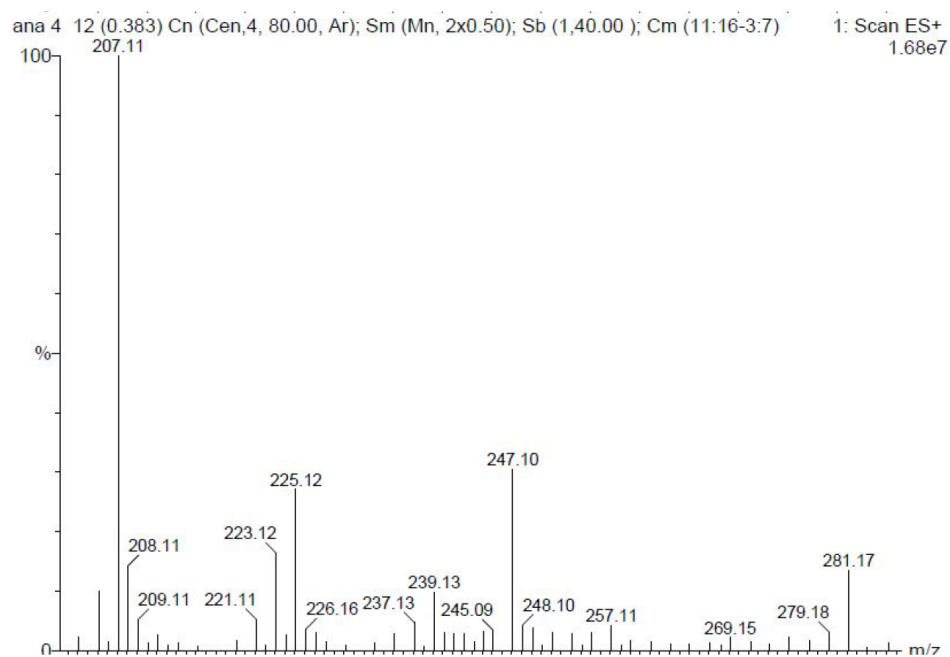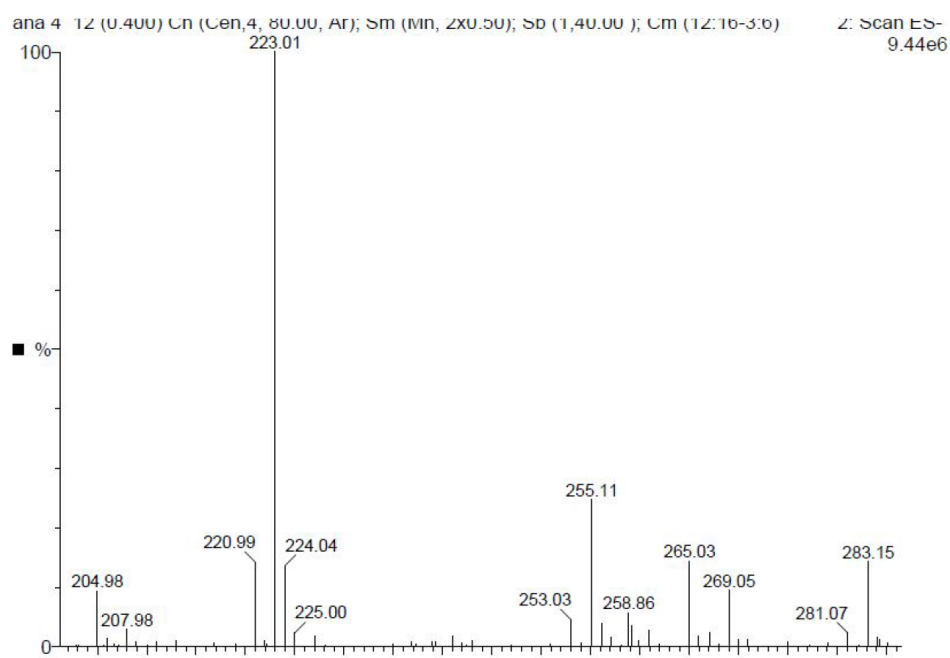

Supplement: s1 [file s1]
